# Supplementary material for: Copper-mediated aerobic oxidative cleavage of α,β-unsaturated ketones to 1,2-diketones
Source: Royal Society of Chemistry journal article supplement (doi:10.1039/c4ra05307a), 2014-07-16
Supplement: c4ra05307a1.pdf [file c4ra05307a1.pdf]

## Supplementary Material

# Copper-Mediated Aerobic Oxidative Cleavage of $\alpha,\beta$ -Unsaturated Ketones to 1,2-Diketones

Zheng Li,\* Junjun Yin, Gong Wen, Tianpeng Li and Xiaoli Shen

College of Chemistry and Chemical Engineering, Northwest Normal University,  
Lanzhou, Gansu, 730070, P. R. China

The copies of IR,  $^1\text{H}$  NMR and  $^{13}\text{C}$  NMR spectra for the products.

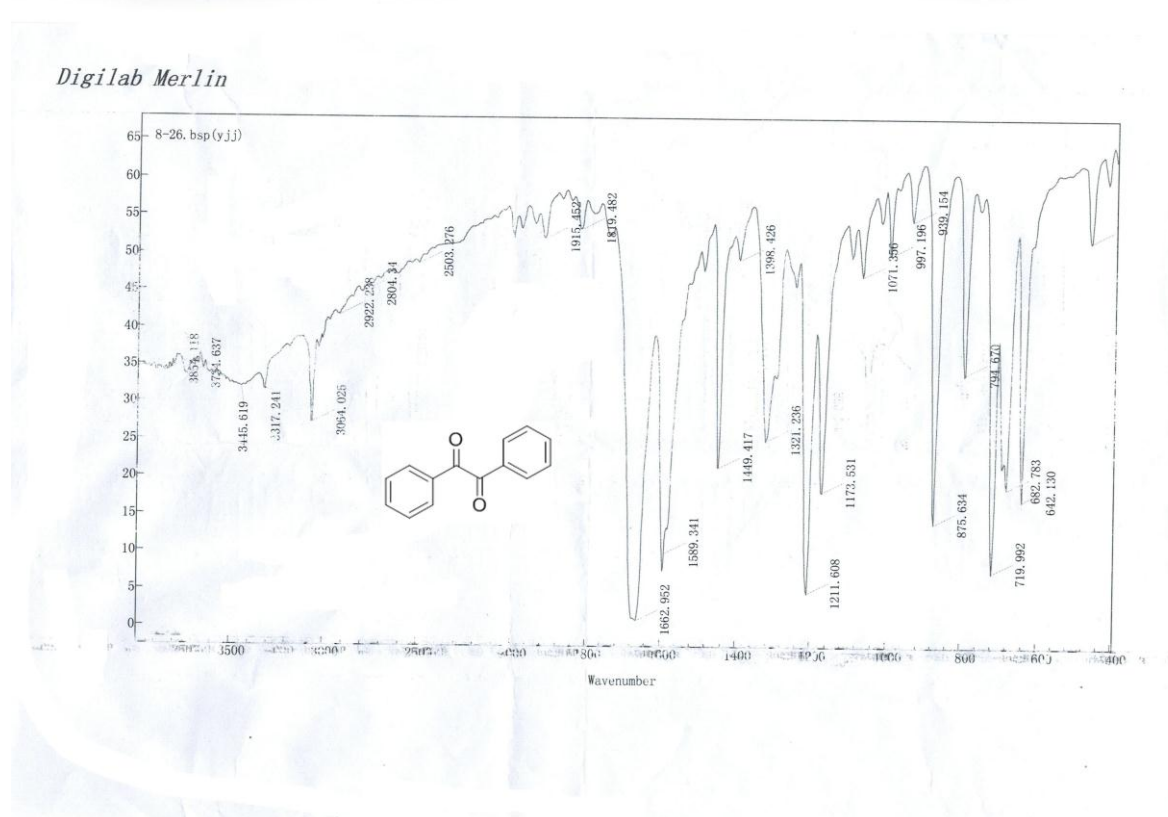

Fig 1. IR of benzil

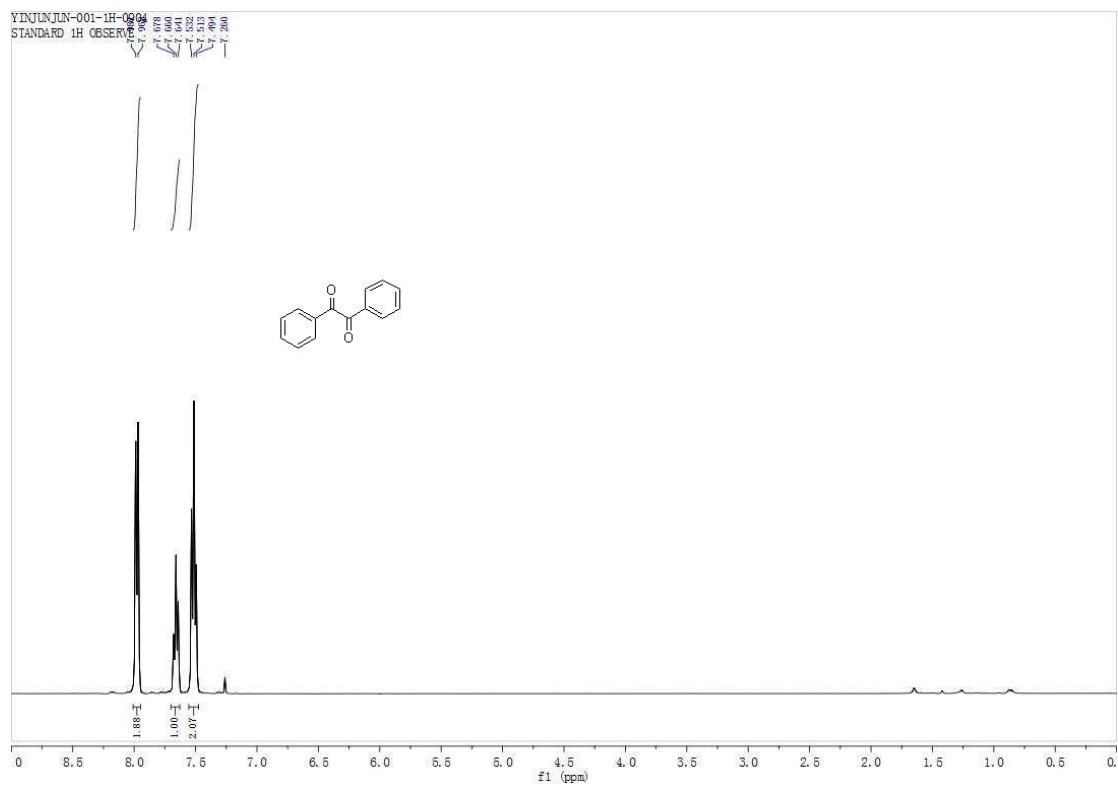

Fig 2.  $^1\text{H}$  NMR of benzil

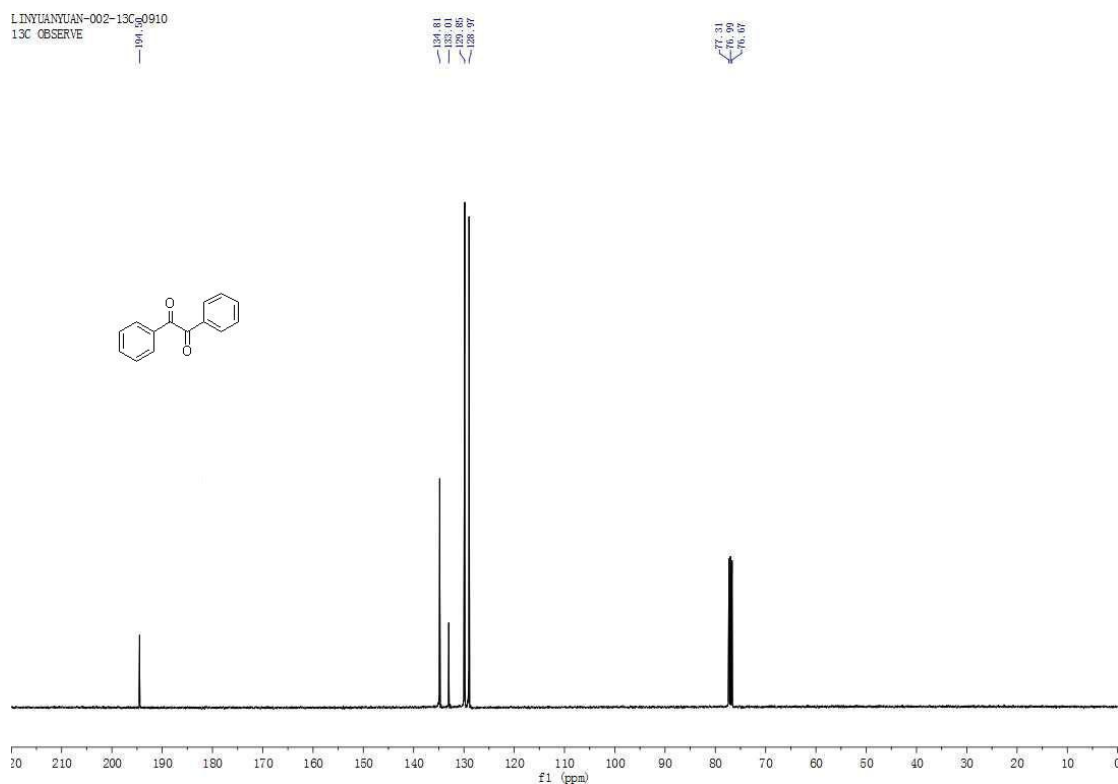

Fig 3.  $^{13}\text{C}$  NMR of benzil

Digilab Merlin

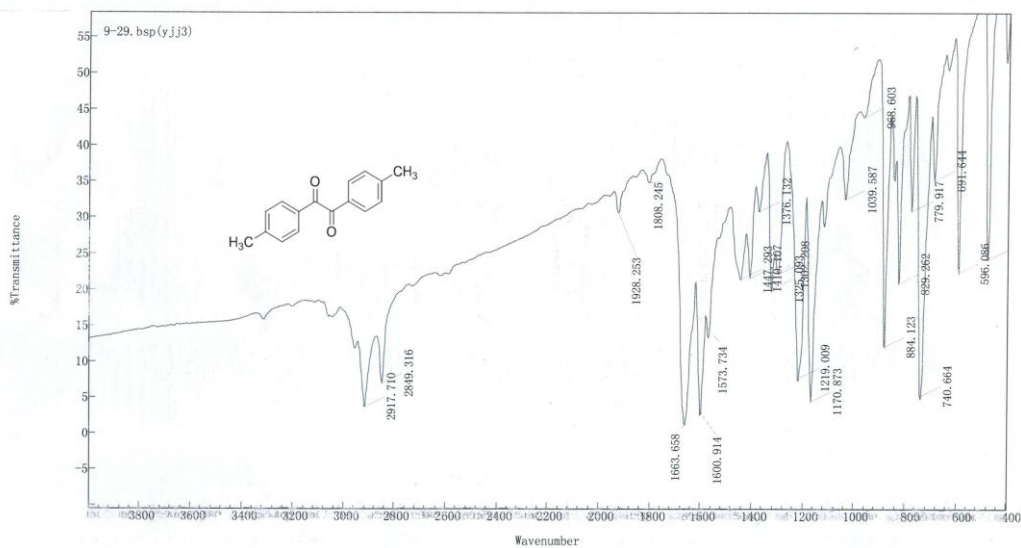

Fig 4. IR of 1,2-di(*p*-tolyl)ethane-1,2-dione

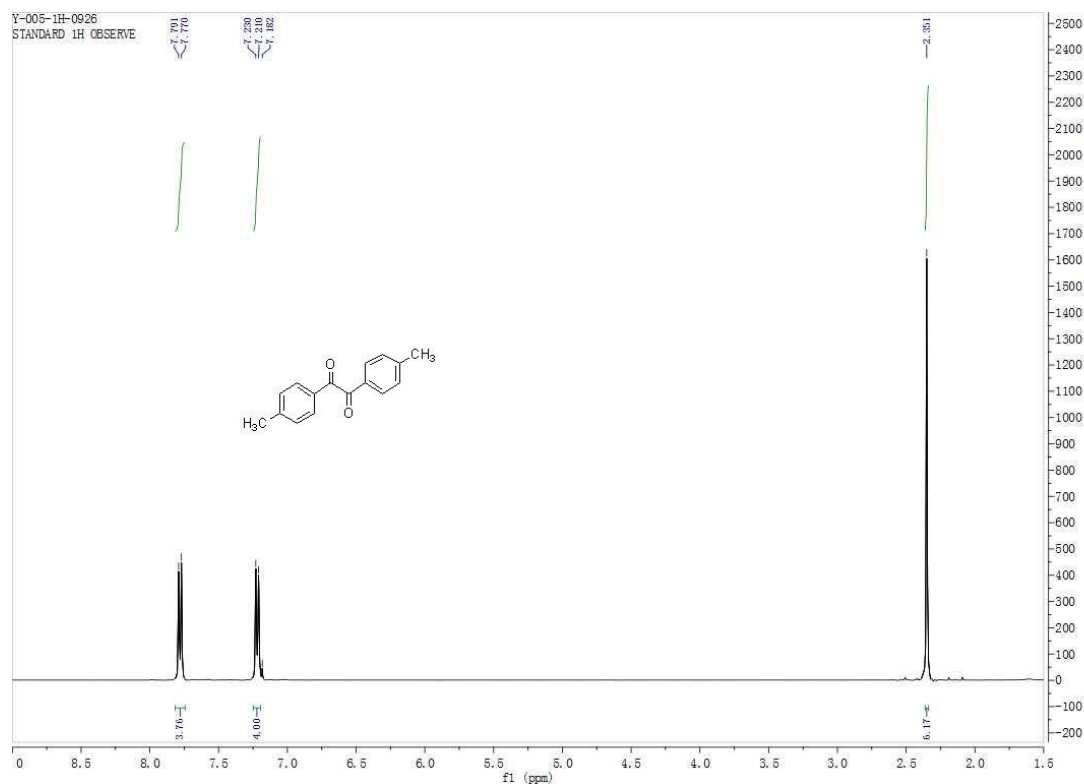

Fig 5. <sup>1</sup>H NMR of 1,2-di(*p*-tolyl)ethane-1,2-dione

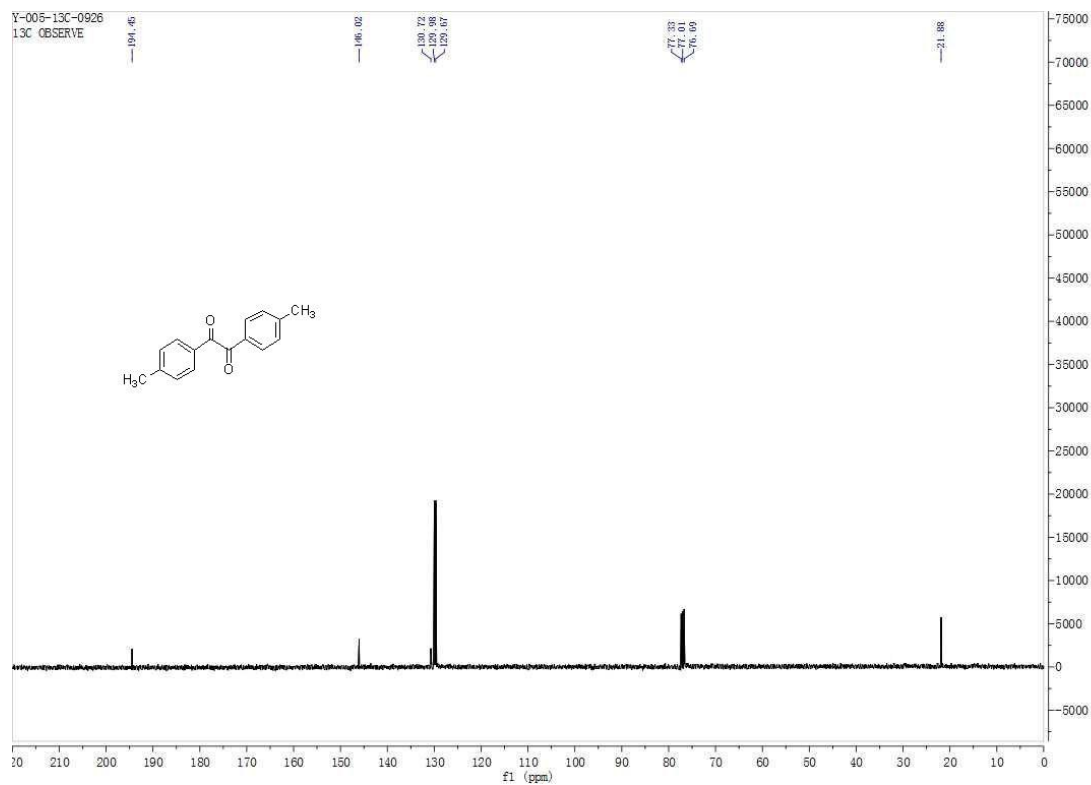

Fig 6.  $^{13}\text{C}$  NMR of 1,2-di(*p*-tolyl)ethane-1,2-dione

Digilab Merlin

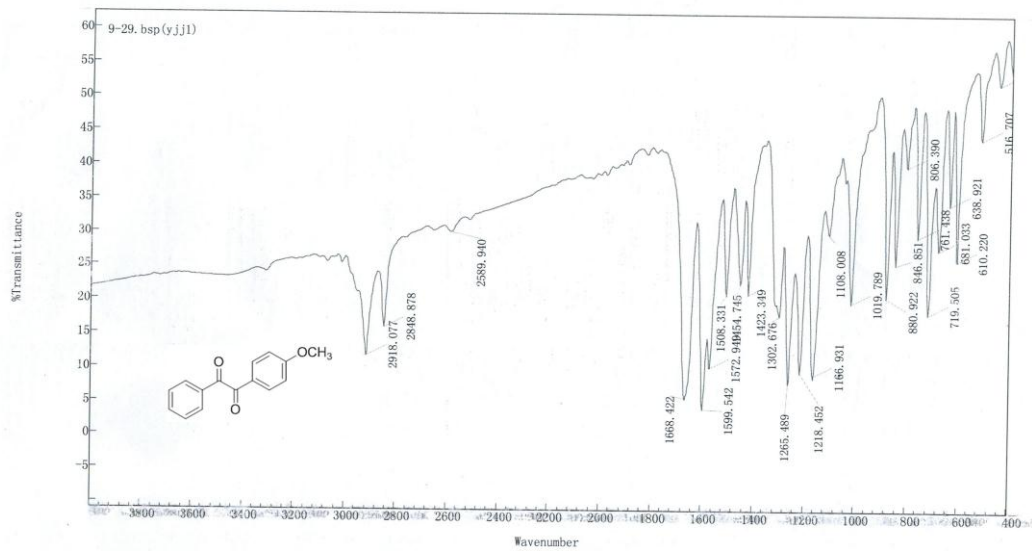

Fig 7. IR of 1-(4-methoxyphenyl)-2-phenylethane-1,2-dione

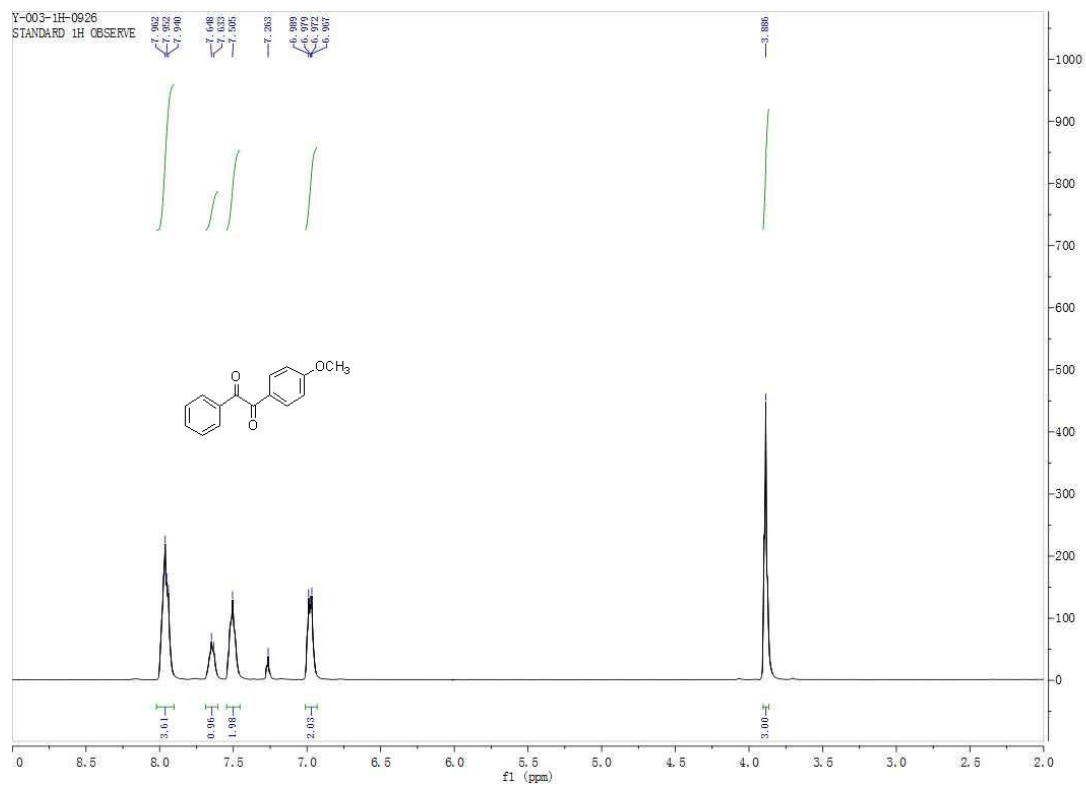

Fig 8.  $^1\text{H}$  NMR of 1-(4-methoxyphenyl)-2-phenylethane-1,2-dione

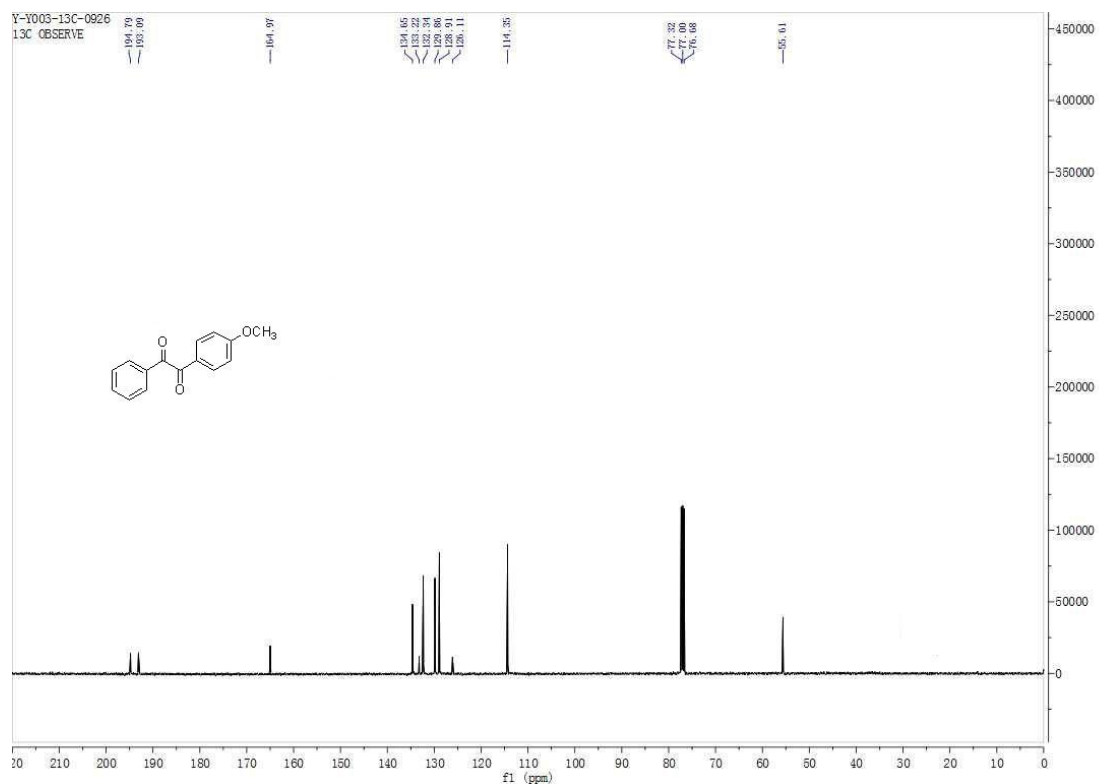

Fig 9.  $^{13}\text{C}$  NMR of 1-(4-methoxyphenyl)-2-phenylethane-1,2-dione

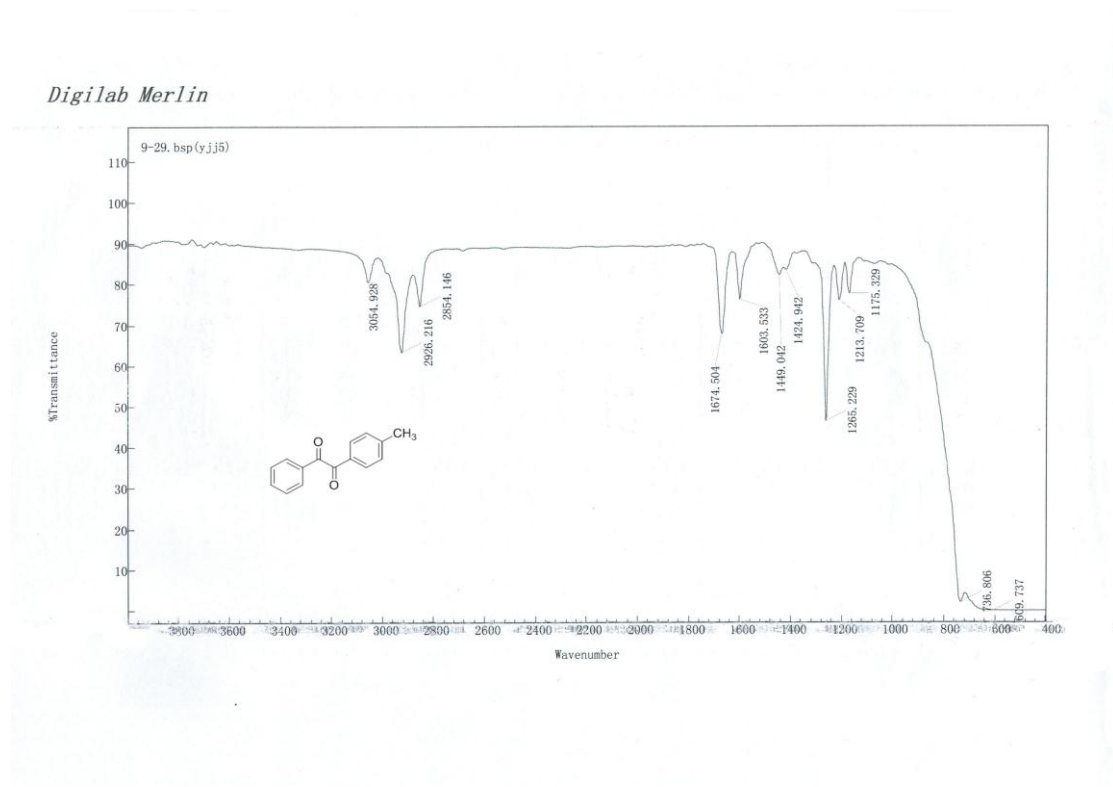

Fig 10. IR of 1-phenyl-2-*p*-tolylethane-1,2-dione

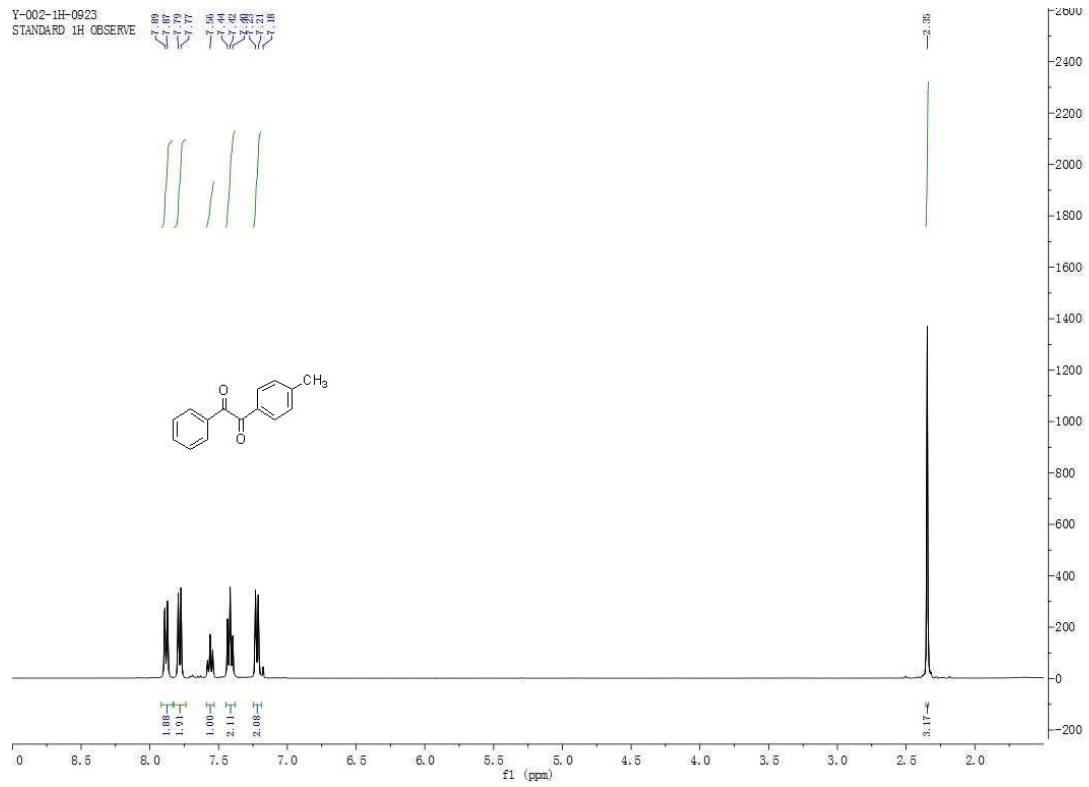

Fig 11. <sup>1</sup>H NMR of 1-phenyl-2-*p*-tolylethane-1,2-dione

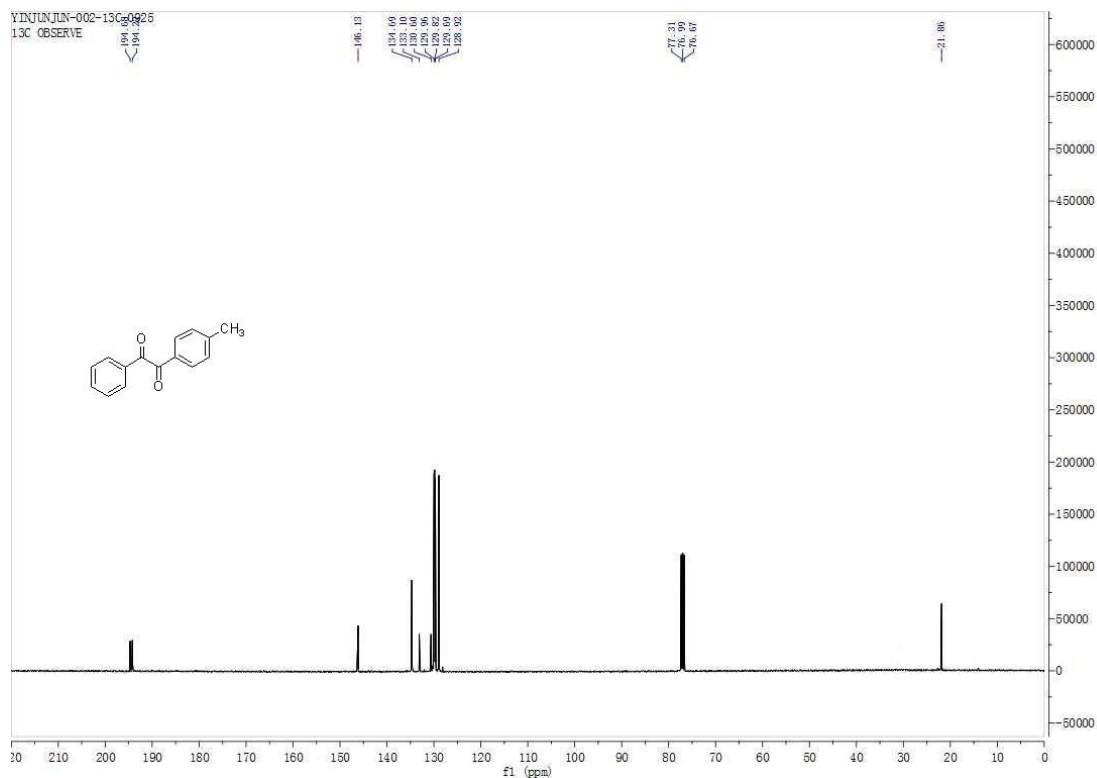

Fig 12.  $^{13}\text{C}$  NMR of 1-phenyl-2-*p*-tolylethane-1,2-dione

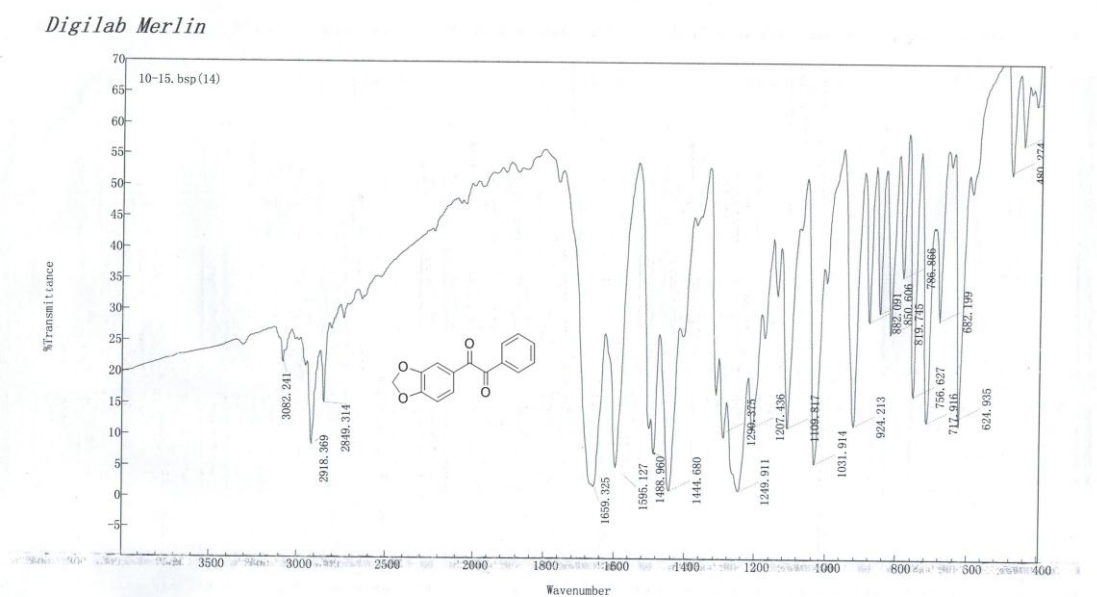

Fig 13. IR of 1-(benzo[*d*][1,3]dioxol-5-yl)-2-phenylethane-1,2-dione

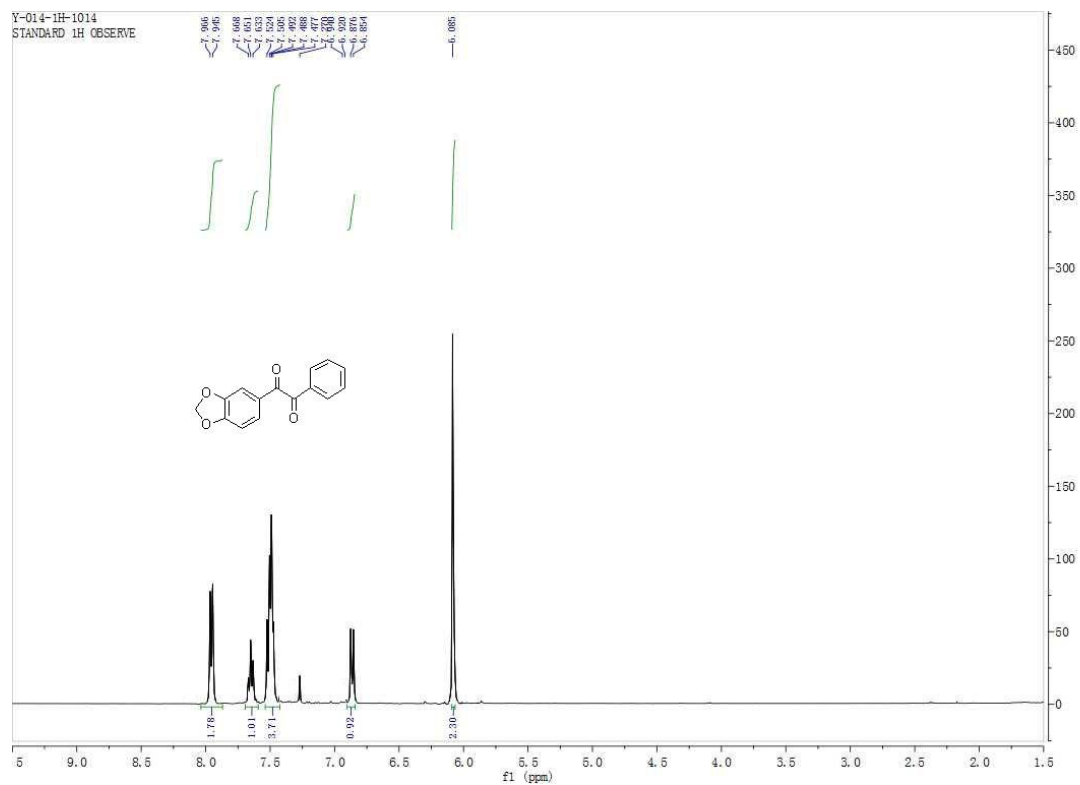

Fig 14.  $^1\text{H}$  NMR of 1-(benzo[*d*][1,3]dioxol-5-yl)-2-phenylethane-1,2-dione

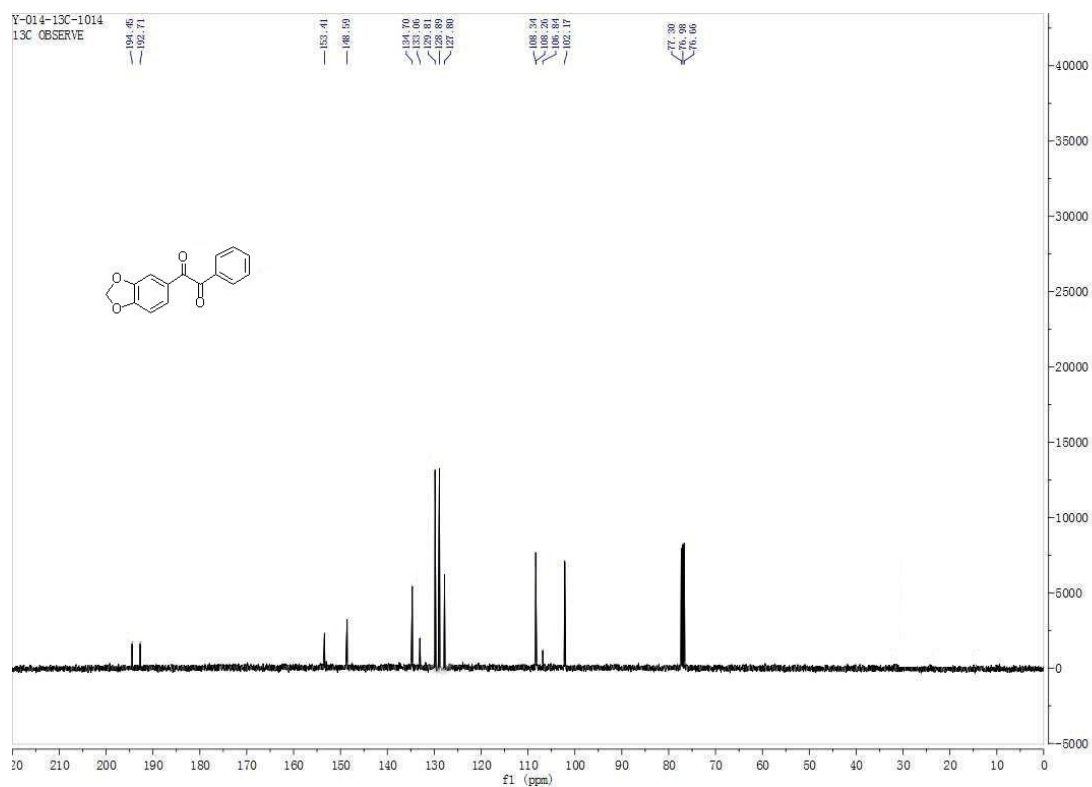

Fig 15.  $^{13}\text{C}$  NMR of 1-(benzo[*d*][1,3]dioxol-5-yl)-2-phenylethane-1,2-dione



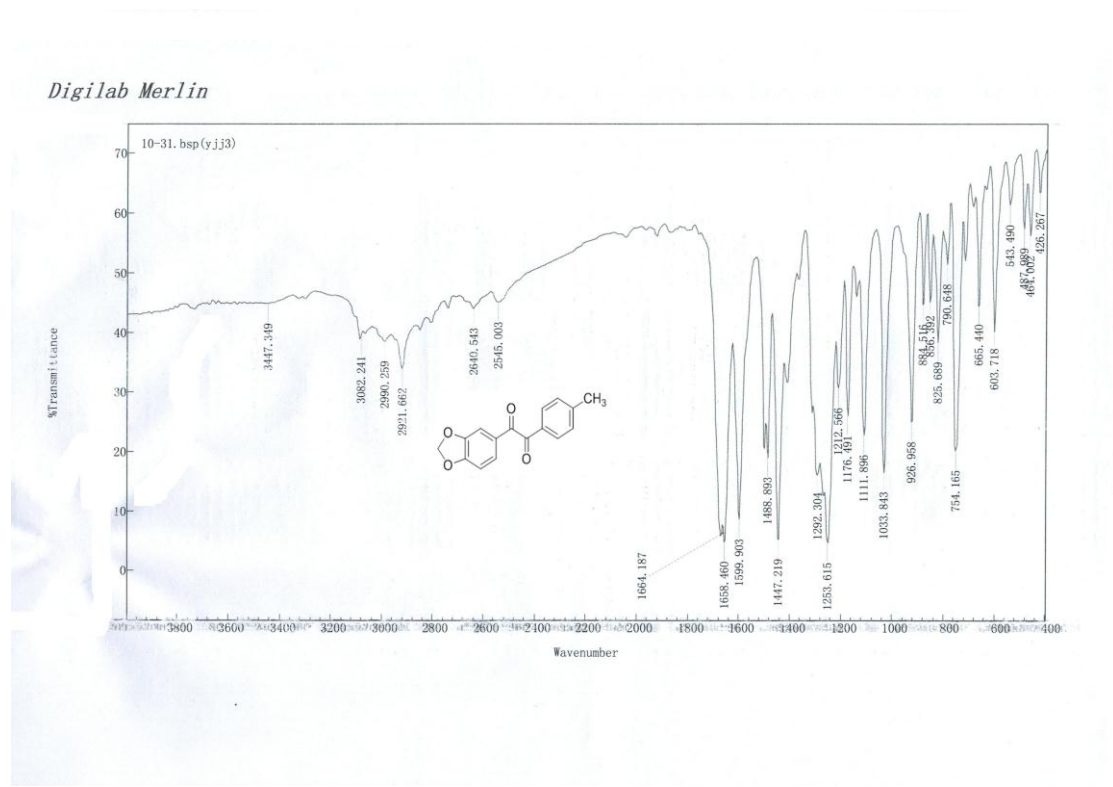

Fig 16. IR of 1-(benzo[d][1,3]dioxol-5-yl)-2-p-tolyethane-1,2-dione

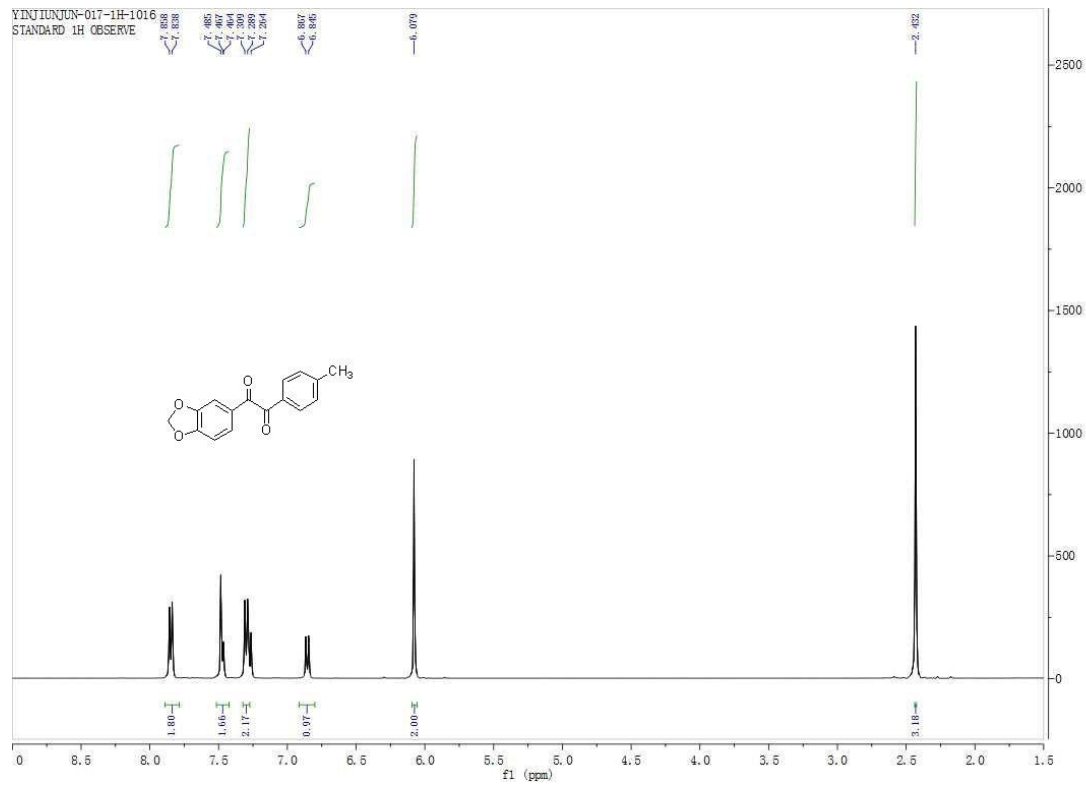

Fig 17. <sup>1</sup>H NMR of 1-(benzo[d][1,3]dioxol-5-yl)-2-p-tolyethane-1,2-dione

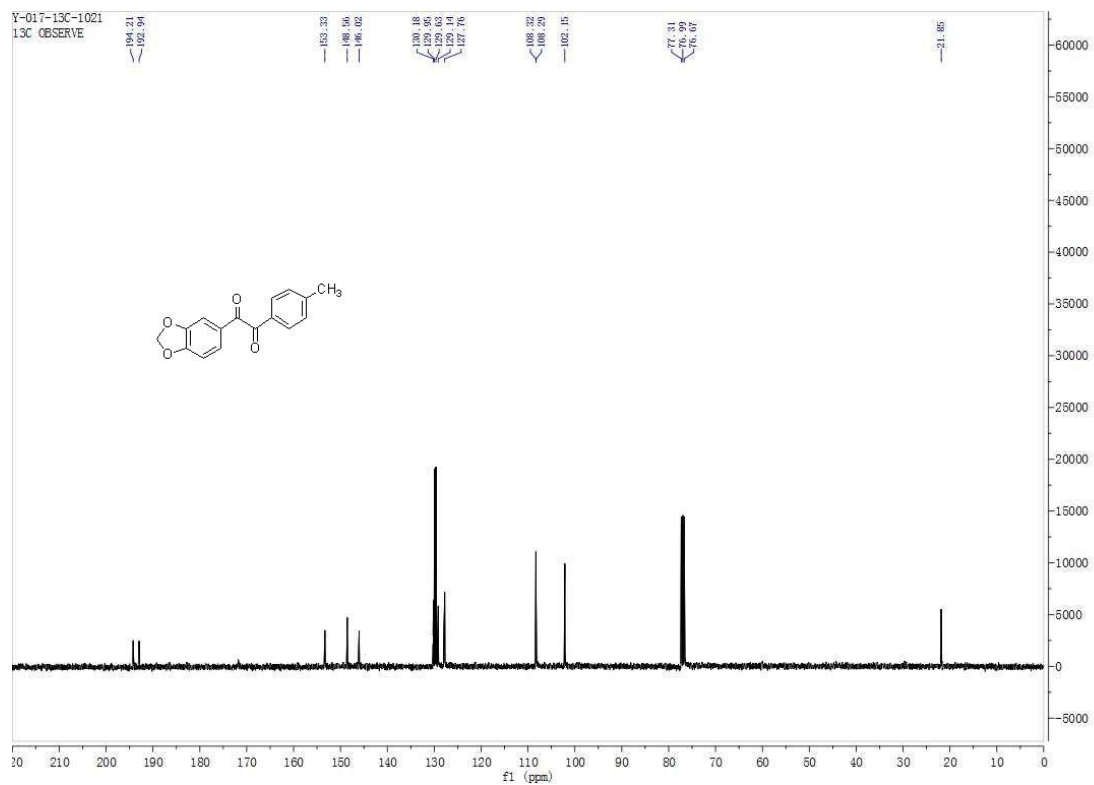

Fig 18.  $^{13}\text{C}$  NMR of 1-(benzo[d][1,3]dioxol-5-yl)-2-p-tolylethane-1,2-dione

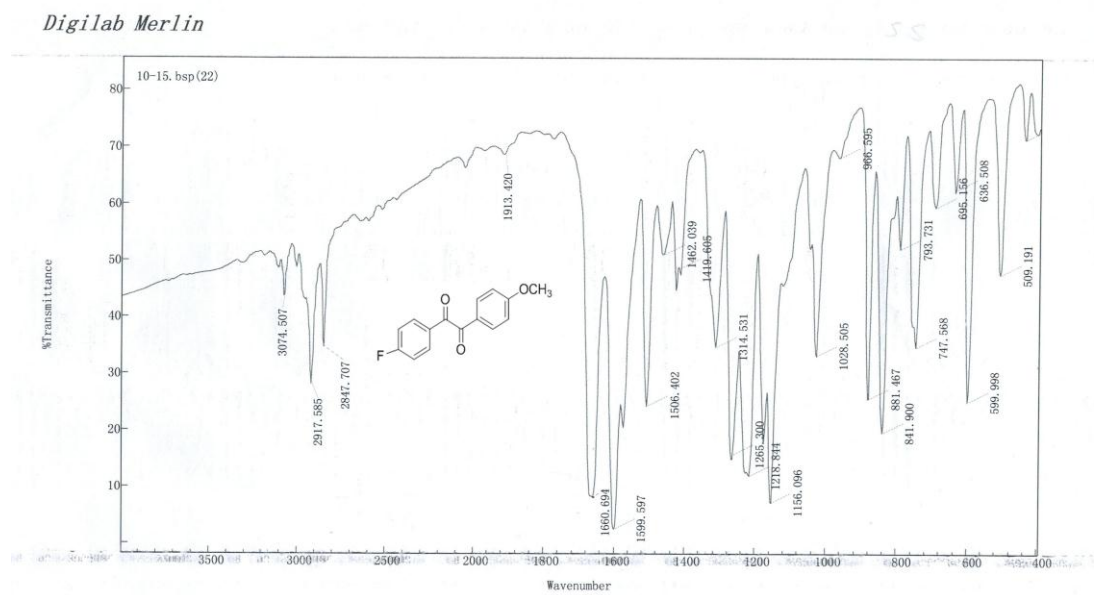

Fig 19. IR of 1-(4-fluorophenyl)-2-(4-methoxyphenyl)ethane-1,2-dione

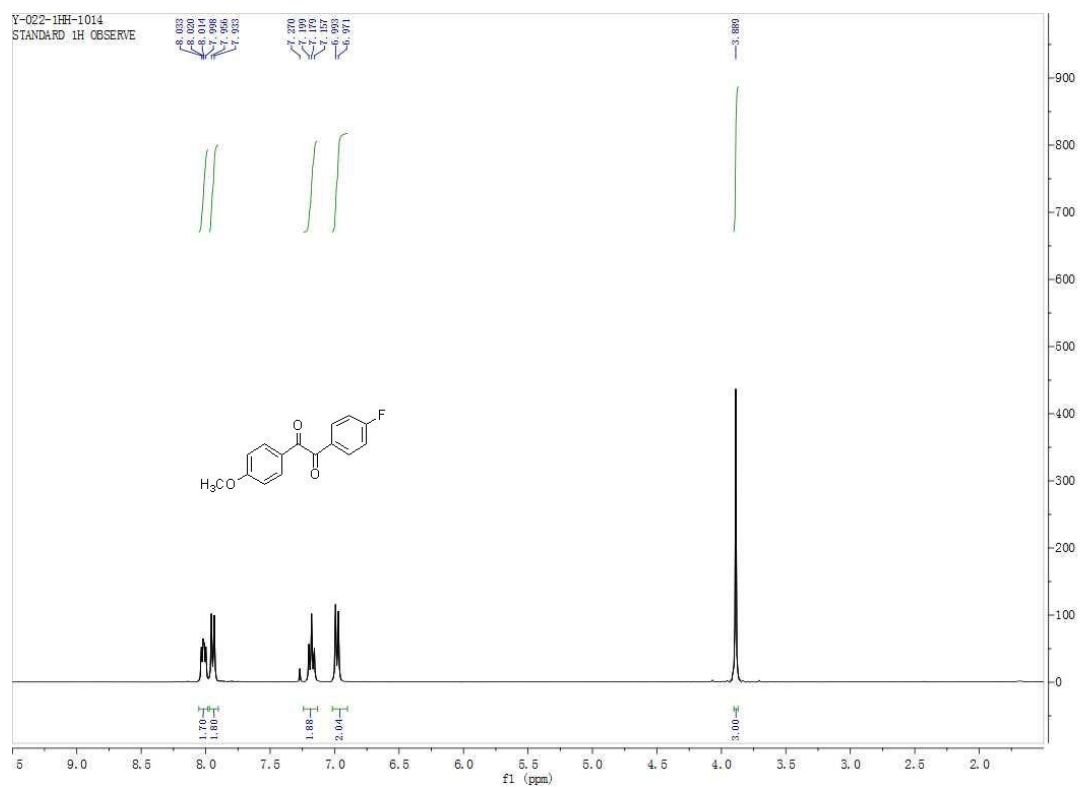

Fig 20.  $^1\text{H}$  NMR of 1-(4-fluorophenyl)-2-(4-methoxyphenyl)ethane-1,2-dione

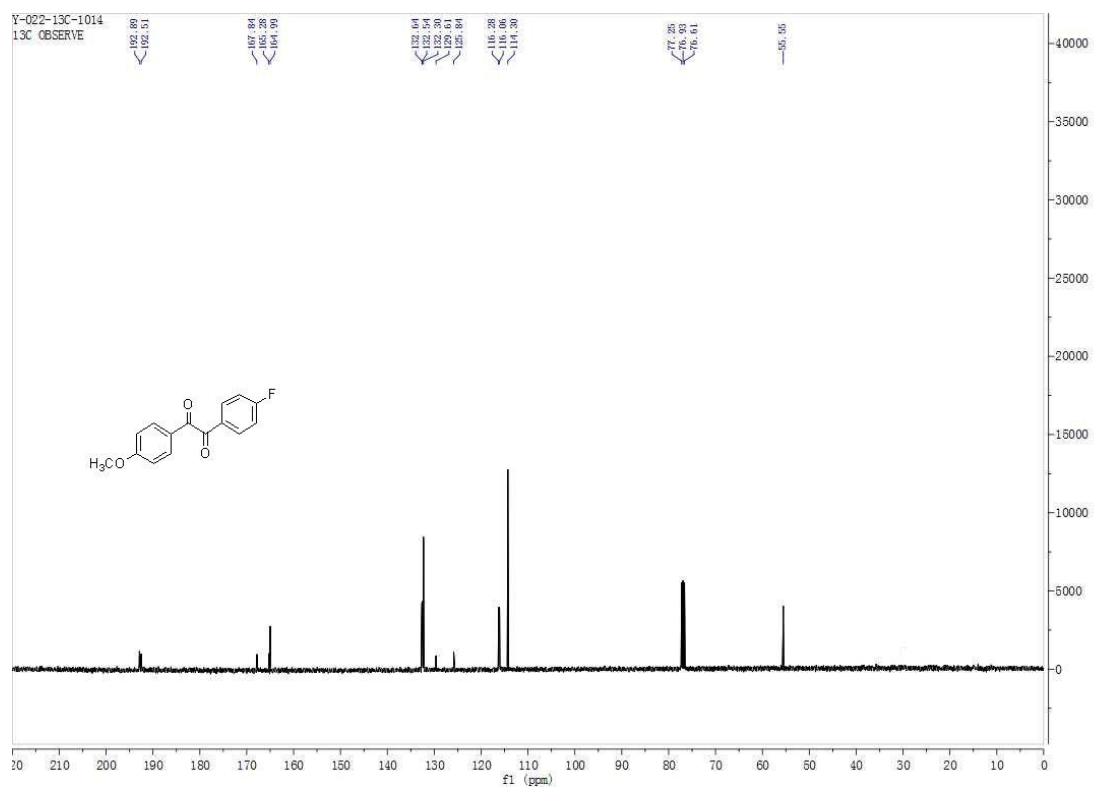

Fig 21.  $^{13}\text{C}$  NMR of 1-(4-fluorophenyl)-2-(4-methoxyphenyl)ethane-1,2-dione

Digilab Merlin

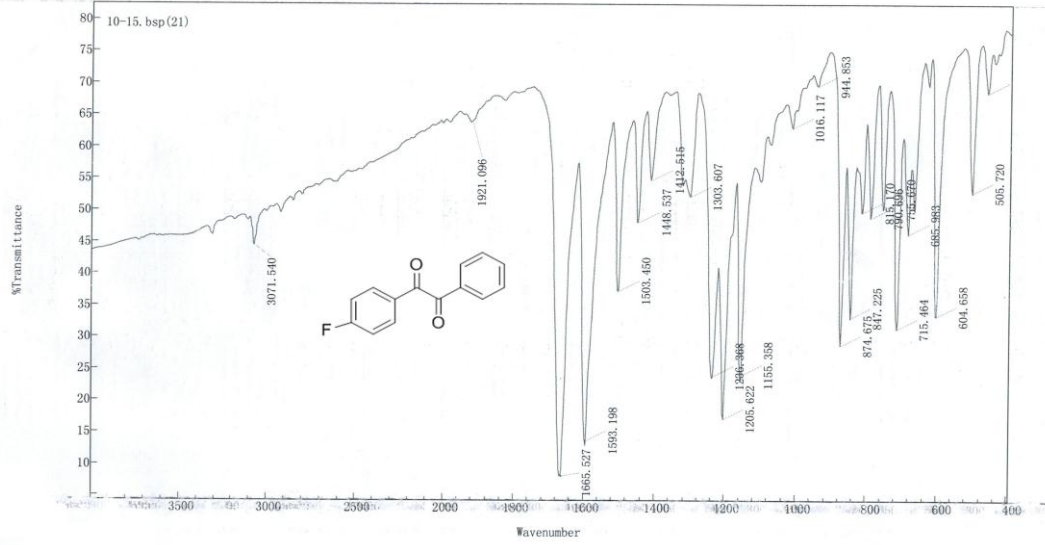

Fig 22. IR of 1-(4-fluorophenyl)-2-phenylethane-1,2-dione

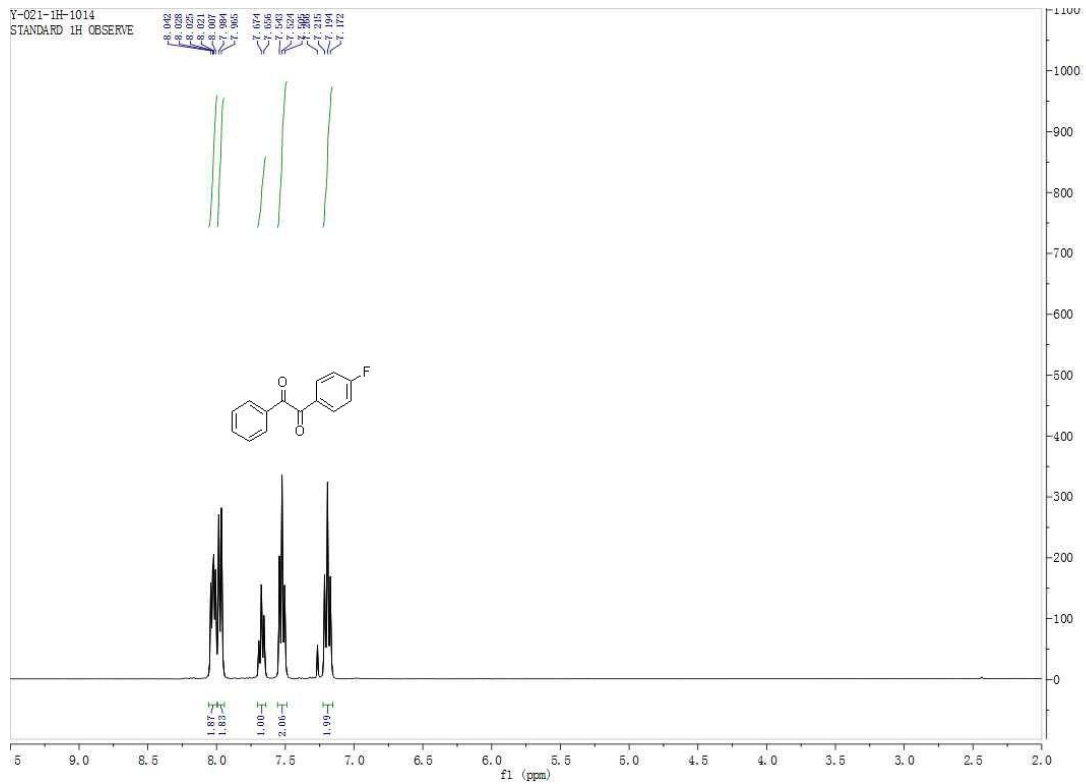

Fig 23. <sup>1</sup>H NMR of 1-(4-fluorophenyl)-2-phenylethane-1,2-dione

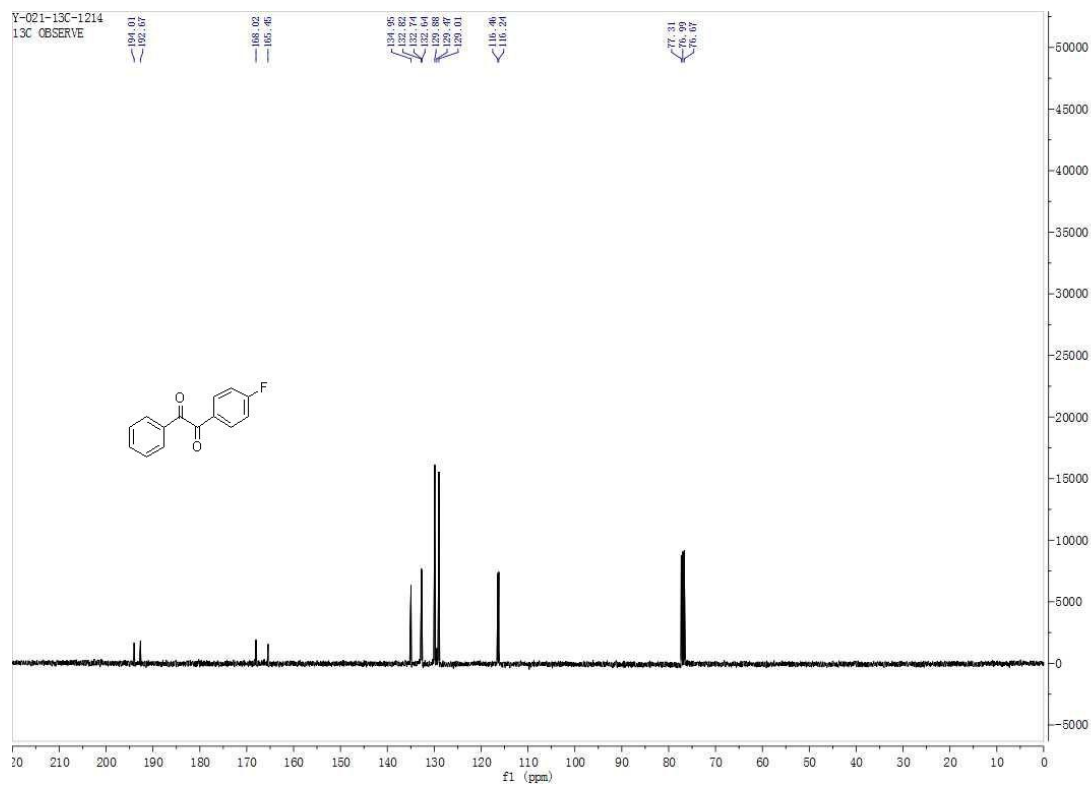

Fig 24.  $^{13}\text{C}$  NMR of 1-(4-fluorophenyl)-2-phenylethane-1,2-dione

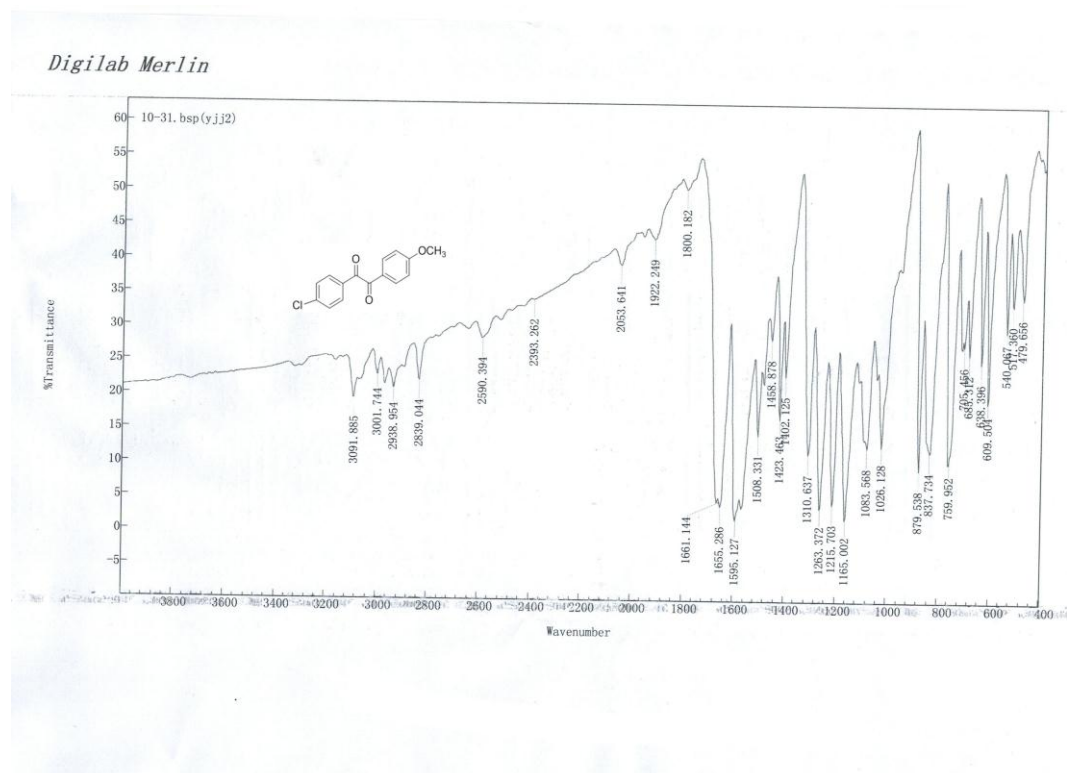

Fig 25. IR of 1-(4-chlorophenyl)-2-(4-methoxyphenyl)ethane-1,2-dione

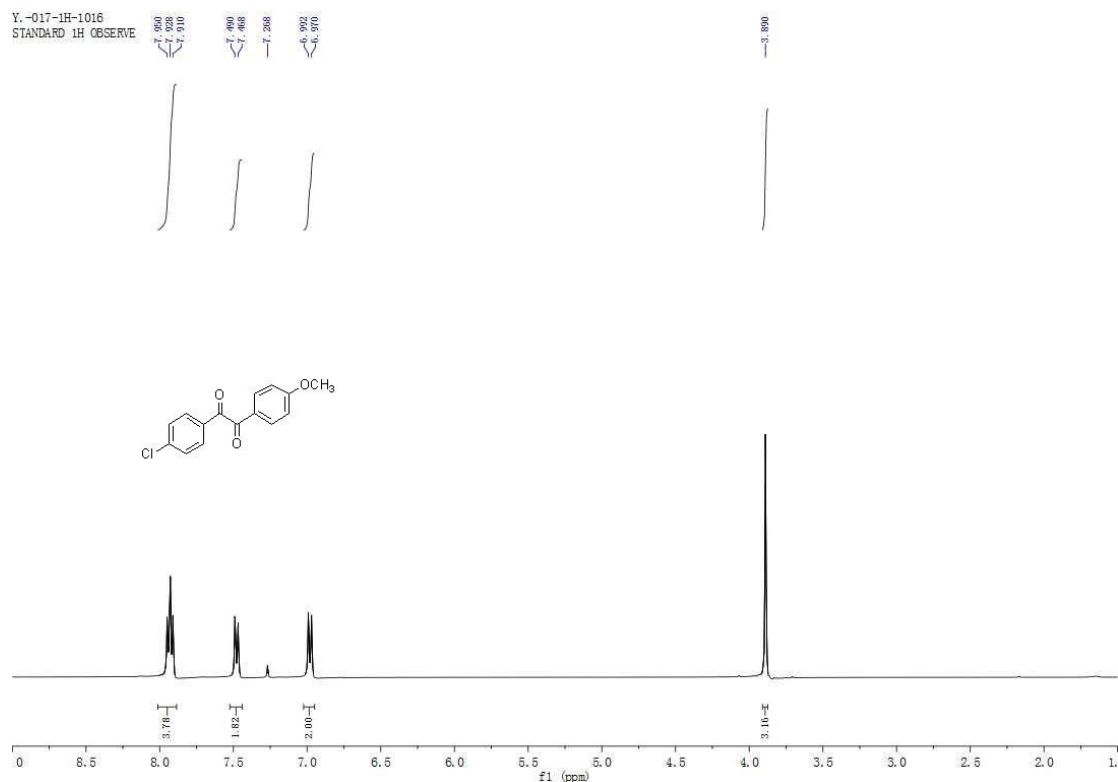

**Fig 26. <sup>1</sup>H NMR of 1-(4-chlorophenyl)-2-(4-methoxyphenyl)ethane-1,2-dione**

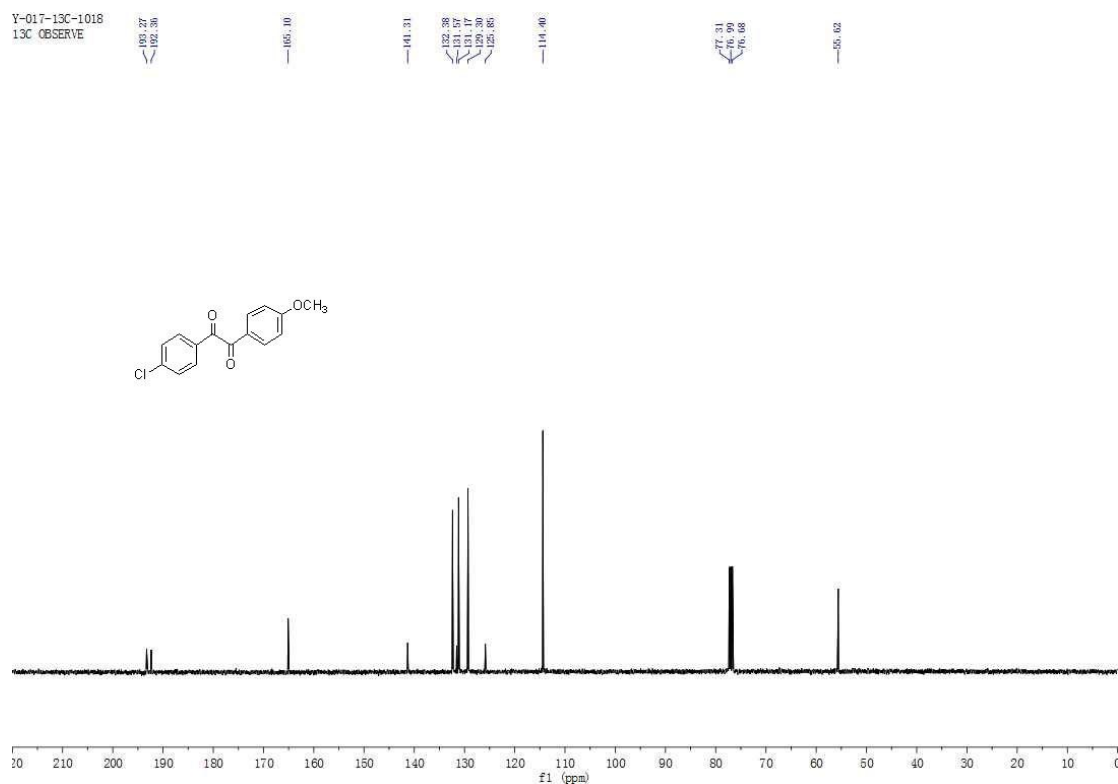

**Fig 27. <sup>13</sup>C NMR of 1-(4-chlorophenyl)-2-(4-methoxyphenyl)ethane-1,2-dione**

Digilab Merlin

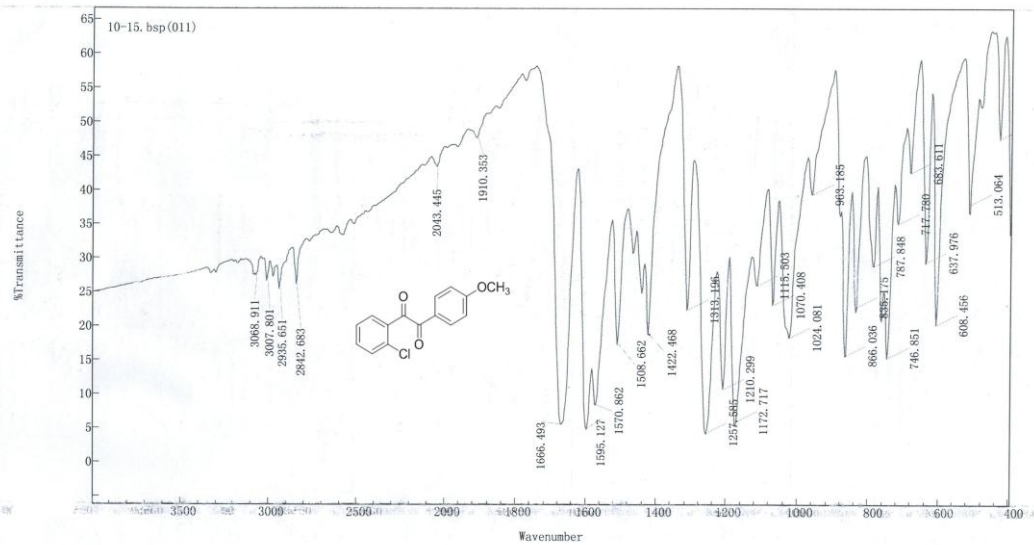

Fig 28. IR of 1-(2-chlorophenyl)-2-(4-methoxyphenyl)ethane-1,2-dione

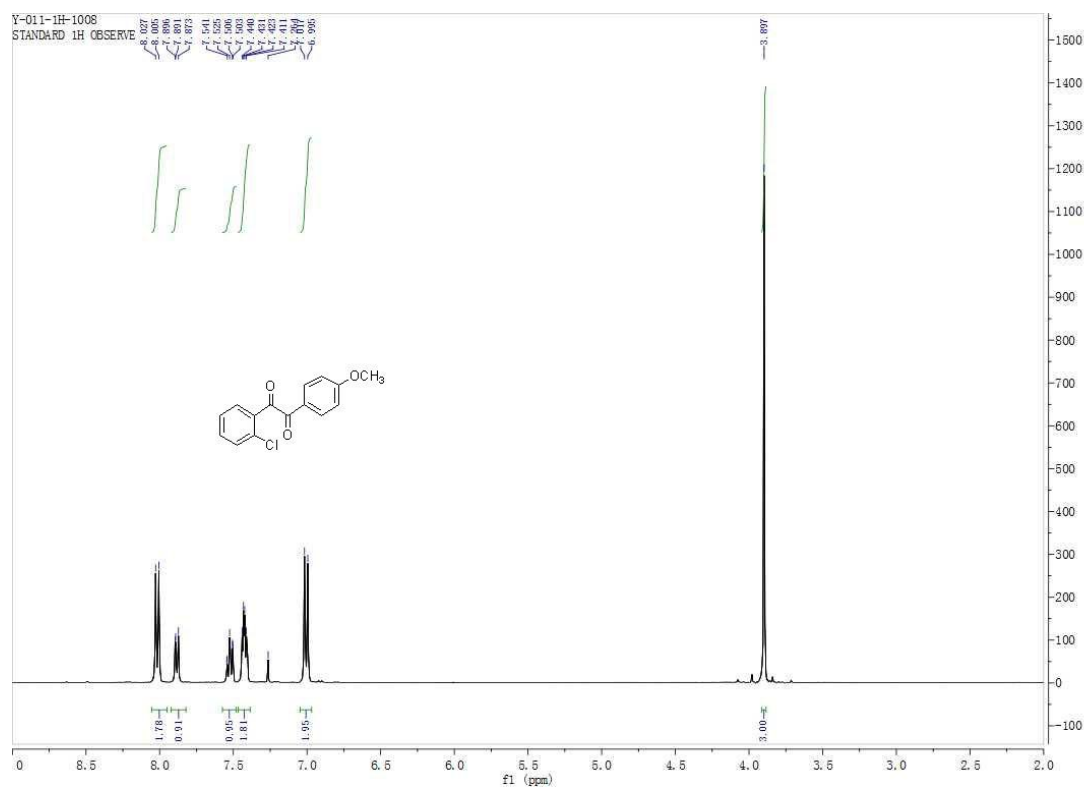

Fig 29. <sup>1</sup>H NMR of 1-(2-chlorophenyl)-2-(4-methoxyphenyl)ethane-1,2-dione

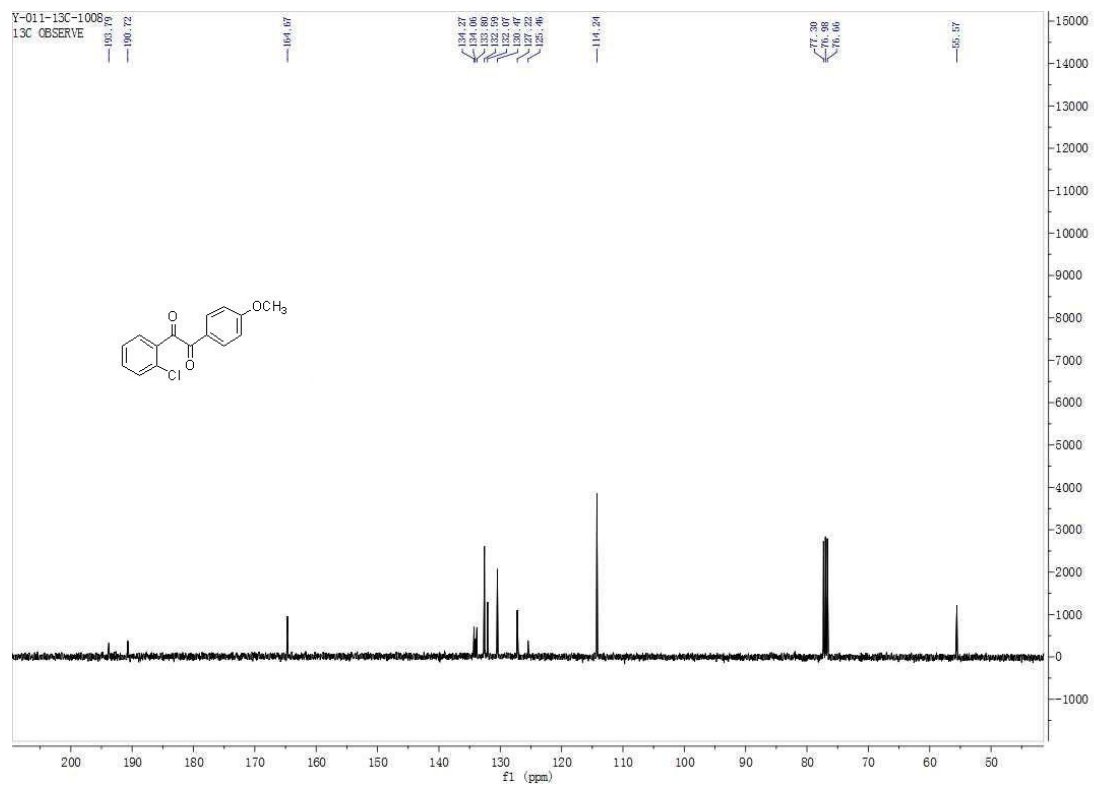

Fig 30.  $^{13}\text{C}$  NMR of 1-(2-chlorophenyl)-2-(4-methoxyphenyl)ethane-1,2-dione

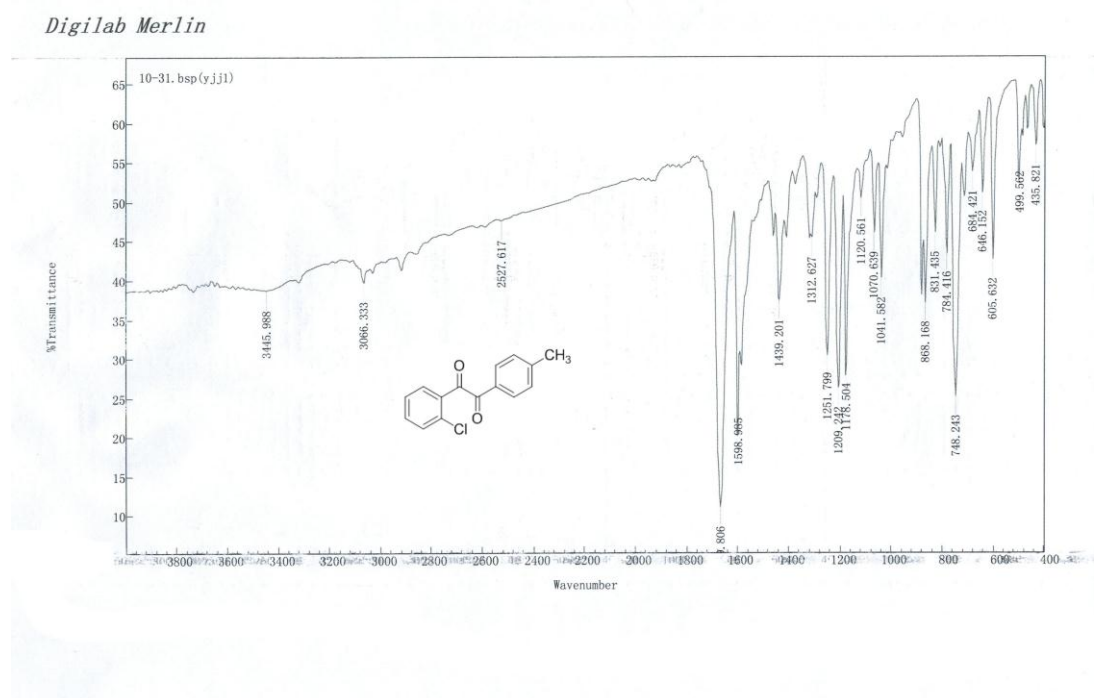

Fig 31. IR of 1-(2-chlorophenyl)-2-p-tolyloethane-1,2-dione



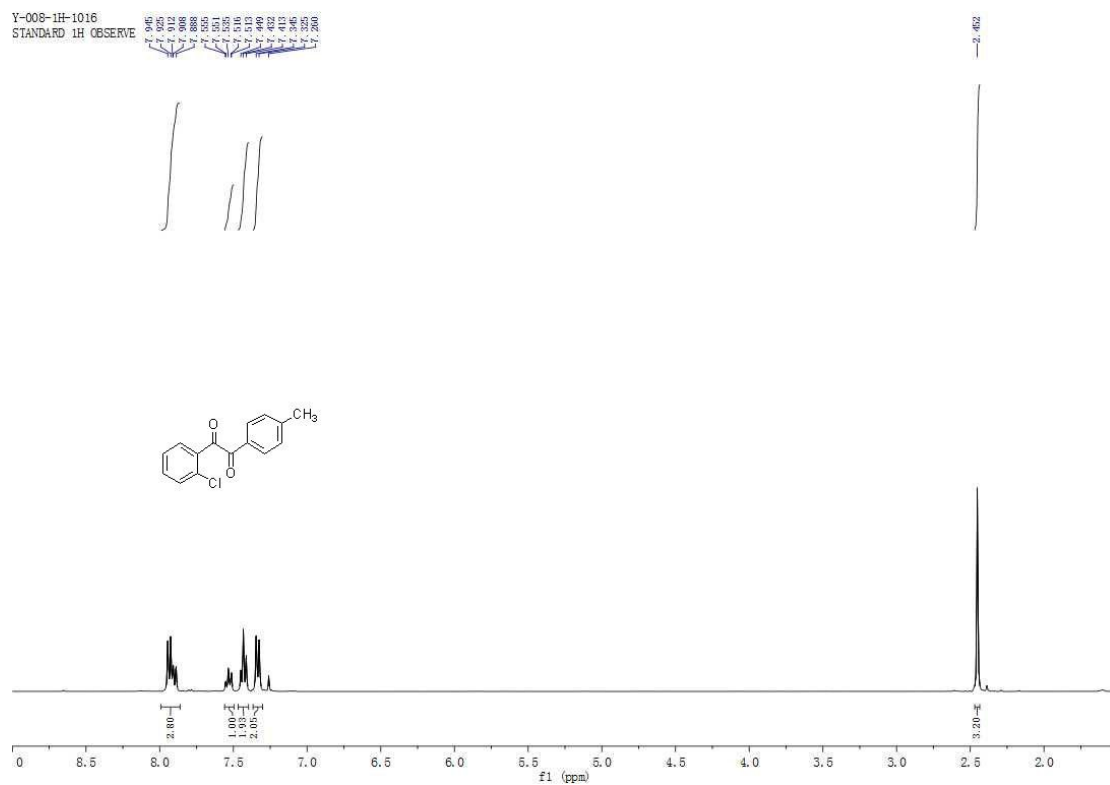

Fig 32.  $^1\text{H}$  NMR of 1-(2-chlorophenyl)-2-*p*-tolylethane-1,2-dione

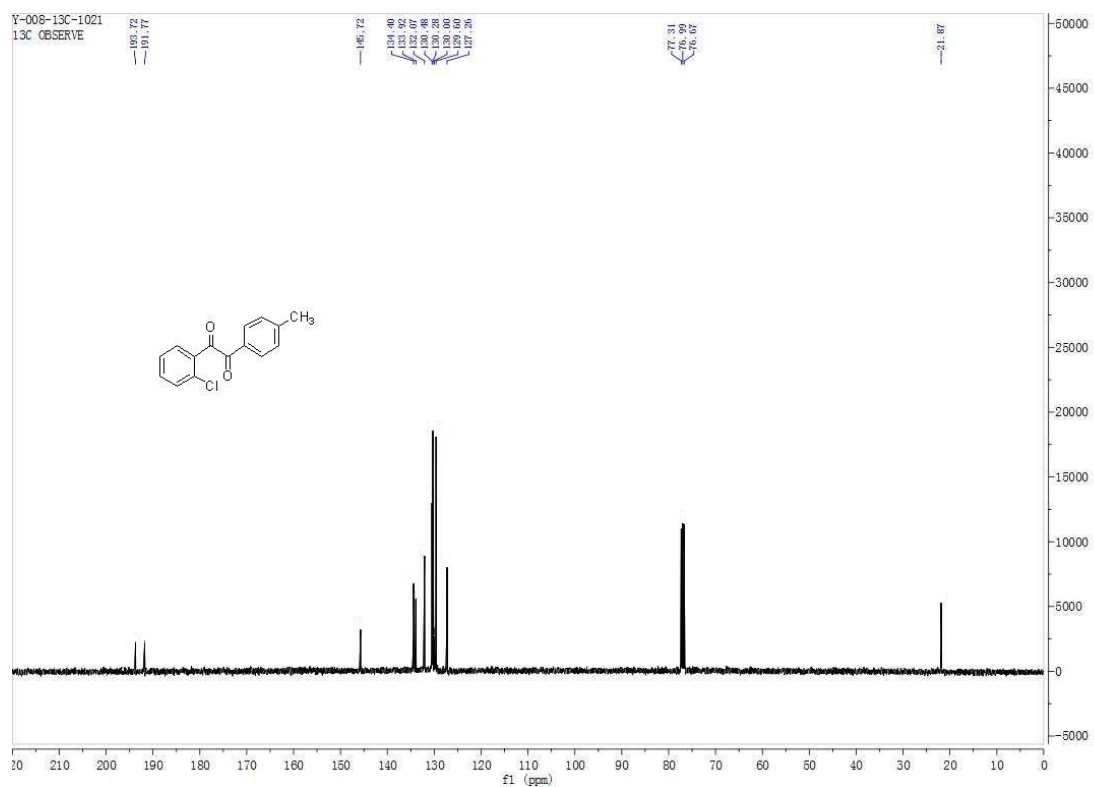

Fig 33.  $^{13}\text{C}$  NMR of 1-(2-chlorophenyl)-2-*p*-tolylethane-1,2-dione

Digilab Merlin

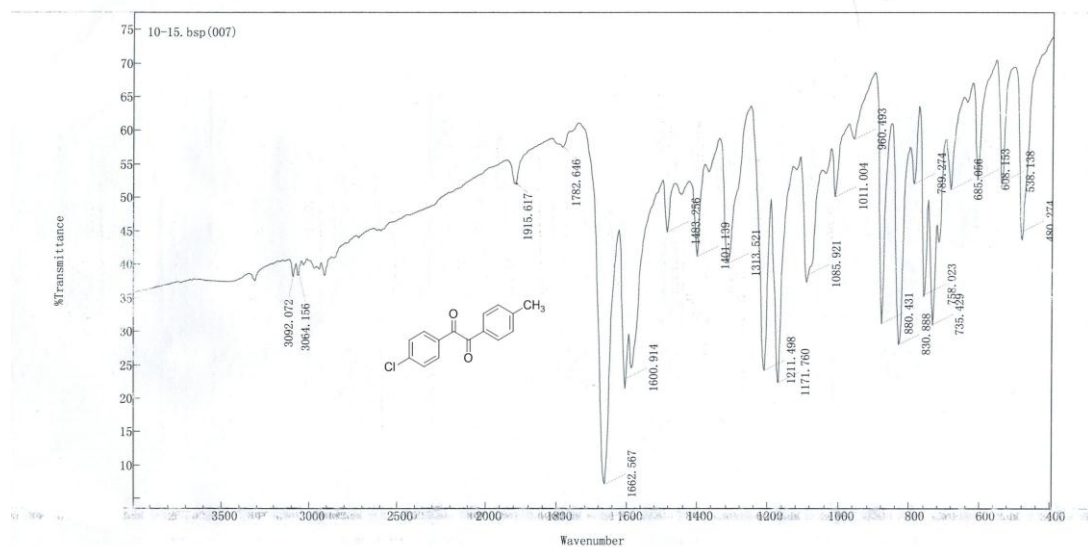

Fig 34. IR of 1-(4-chlorophenyl)-2-p-tolyloethane-1,2-dione

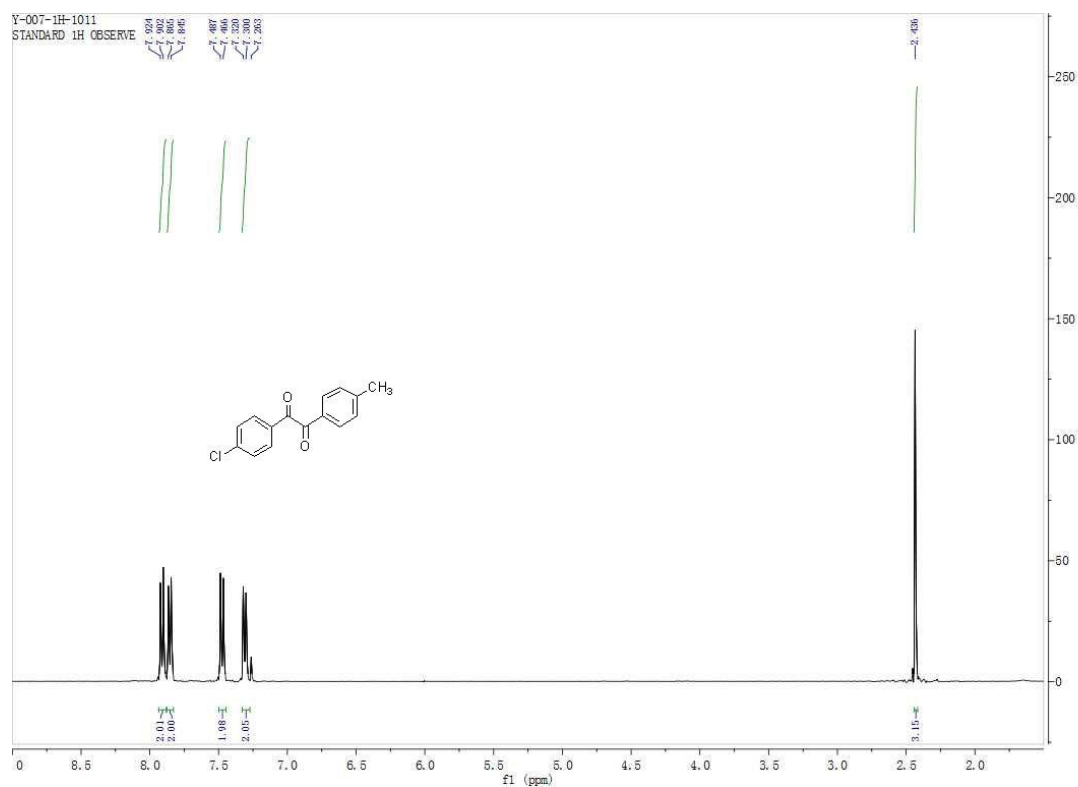

Fig 35. <sup>1</sup>H NMR of 1-(4-chlorophenyl)-2-p-tolyloethane-1,2-dione

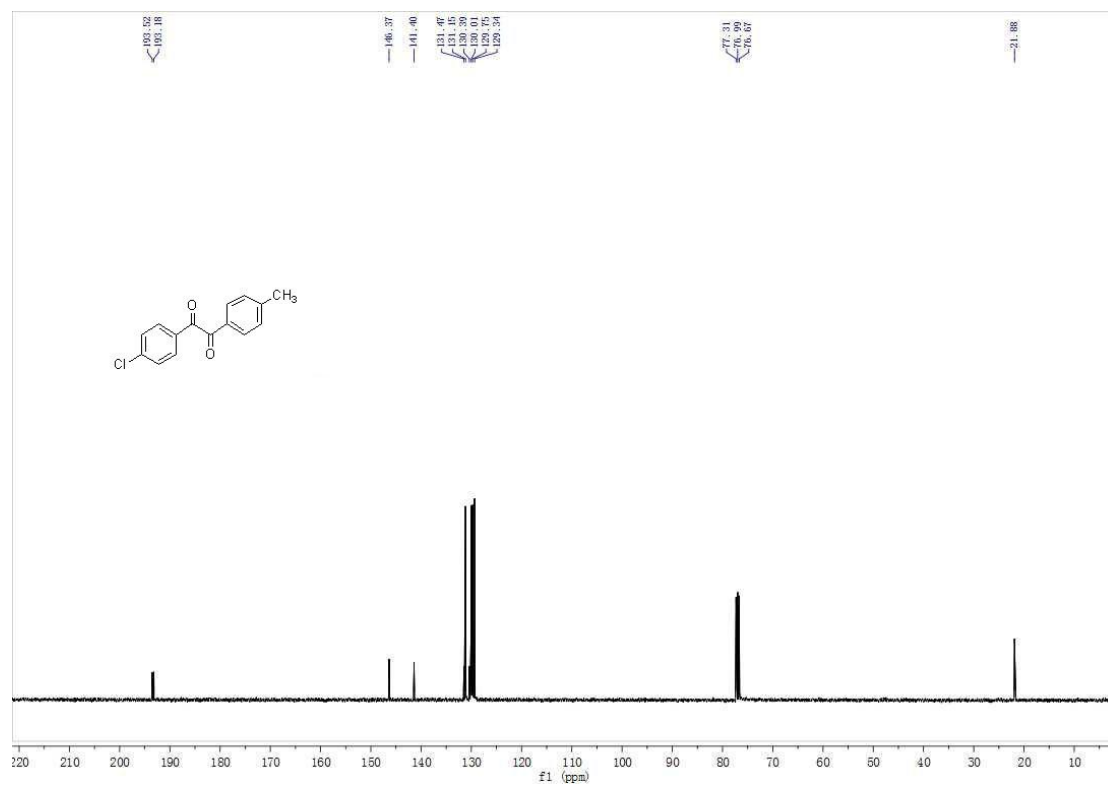

Fig 36.  $^{13}\text{C}$  NMR of 1-(4-chlorophenyl)-2-*p*-tolylethane-1,2-dione

Digilab Merlin

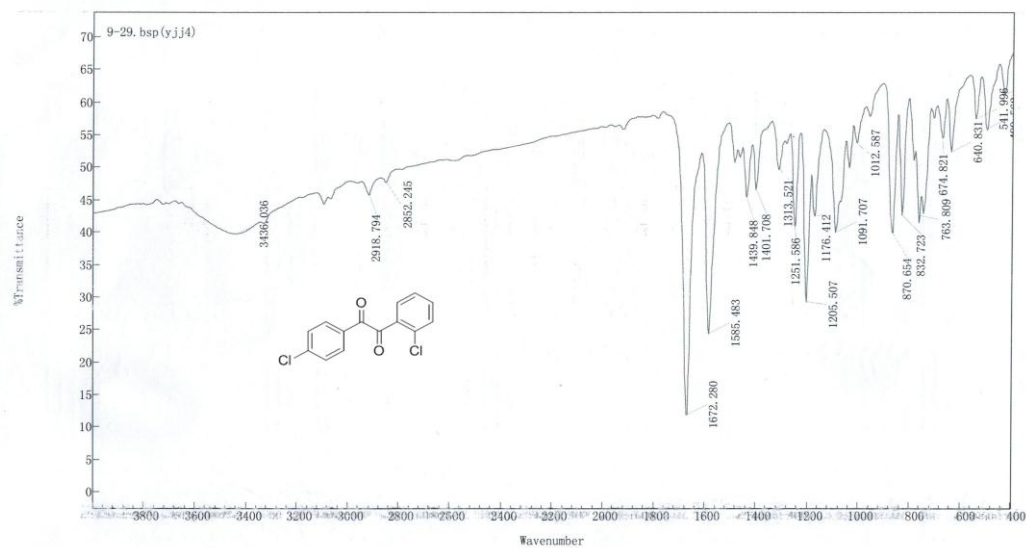

Fig 37. IR of 1-(2-chlorophenyl)-2-(4-chlorophenyl)ethane-1,2-dione

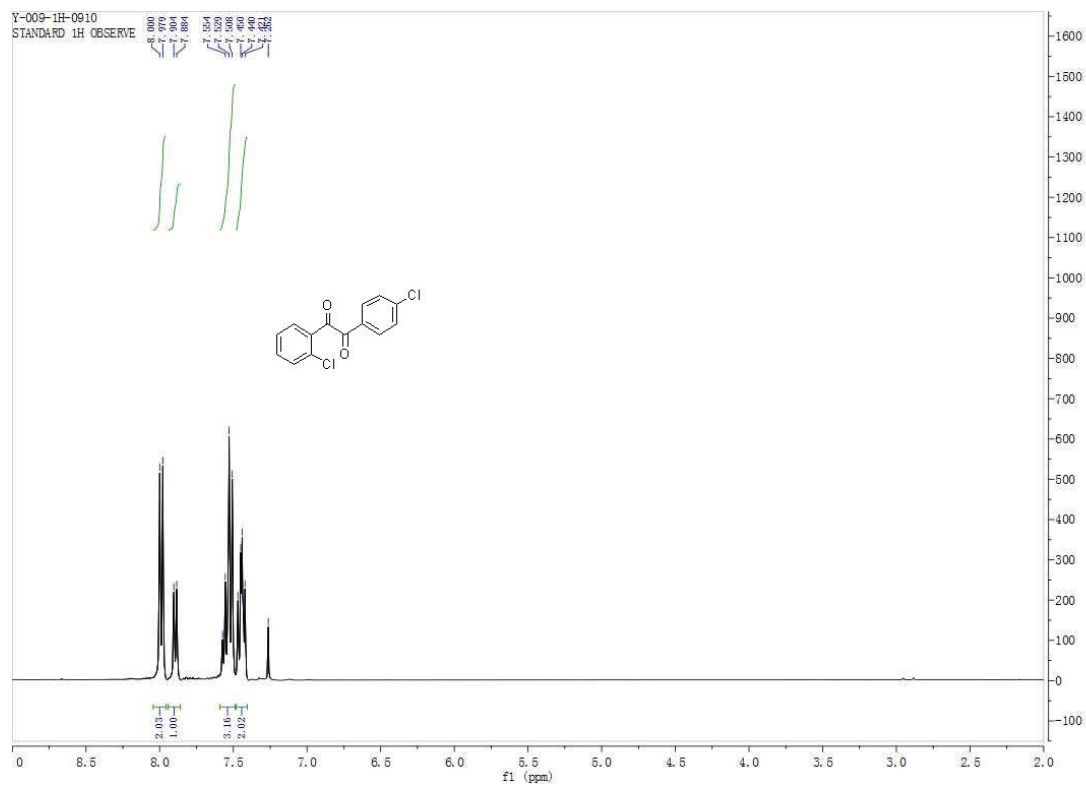

**Fig 38. <sup>1</sup>H NMR of 1-(2-chlorophenyl)-2-(4-chlorophenyl)ethane-1,2-dione**

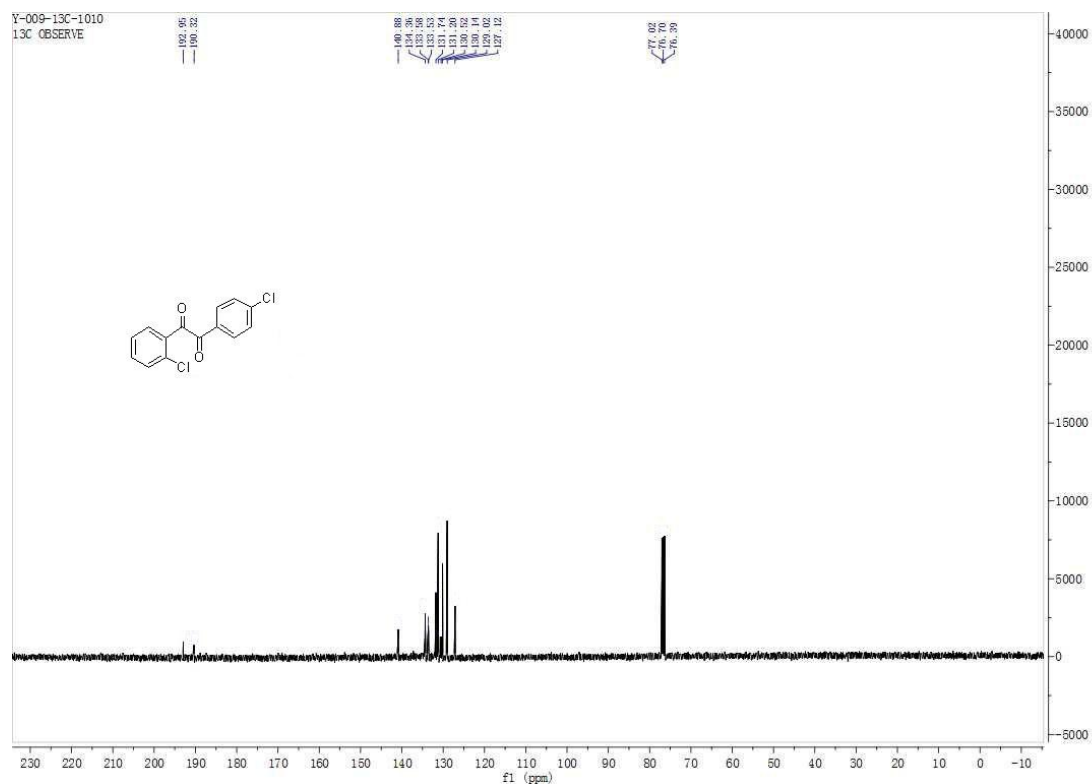

**Fig 39. <sup>13</sup>C NMR of 1-(2-chlorophenyl)-2-(4-chlorophenyl)ethane-1,2-dione**

Digilab Merlin

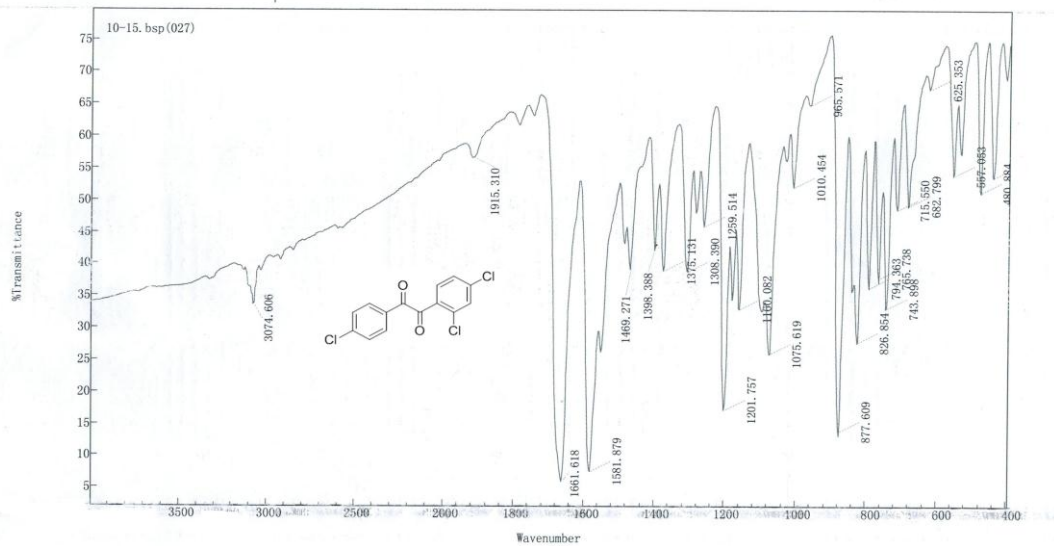

Fig 40. IR of 1-(4-chlorophenyl)-2-(2,4-dichlorophenyl)ethane-1,2-dione

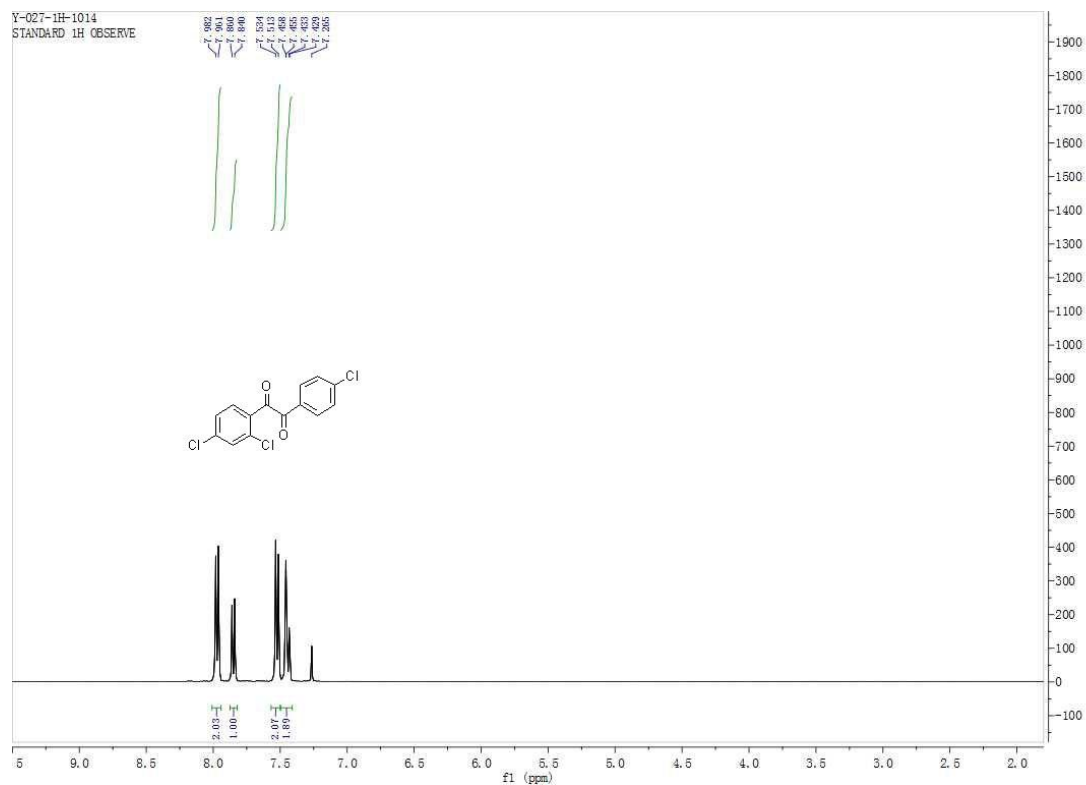

Fig 41. <sup>1</sup>H NMR of 1-(4-chlorophenyl)-2-(2,4-dichlorophenyl)ethane-1,2-dione

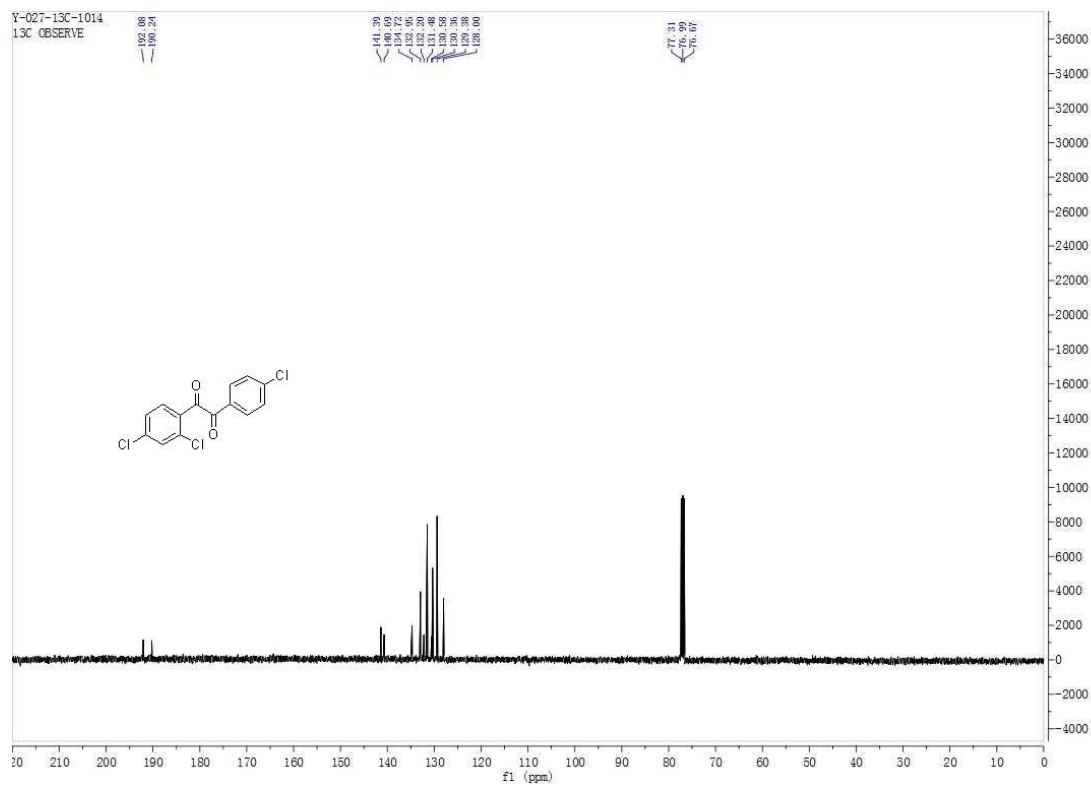

Fig 42.  $^{13}\text{C}$  NMR of 1-(4-chlorophenyl)-2-(2,4-dichlorophenyl)ethane-1,2-dione

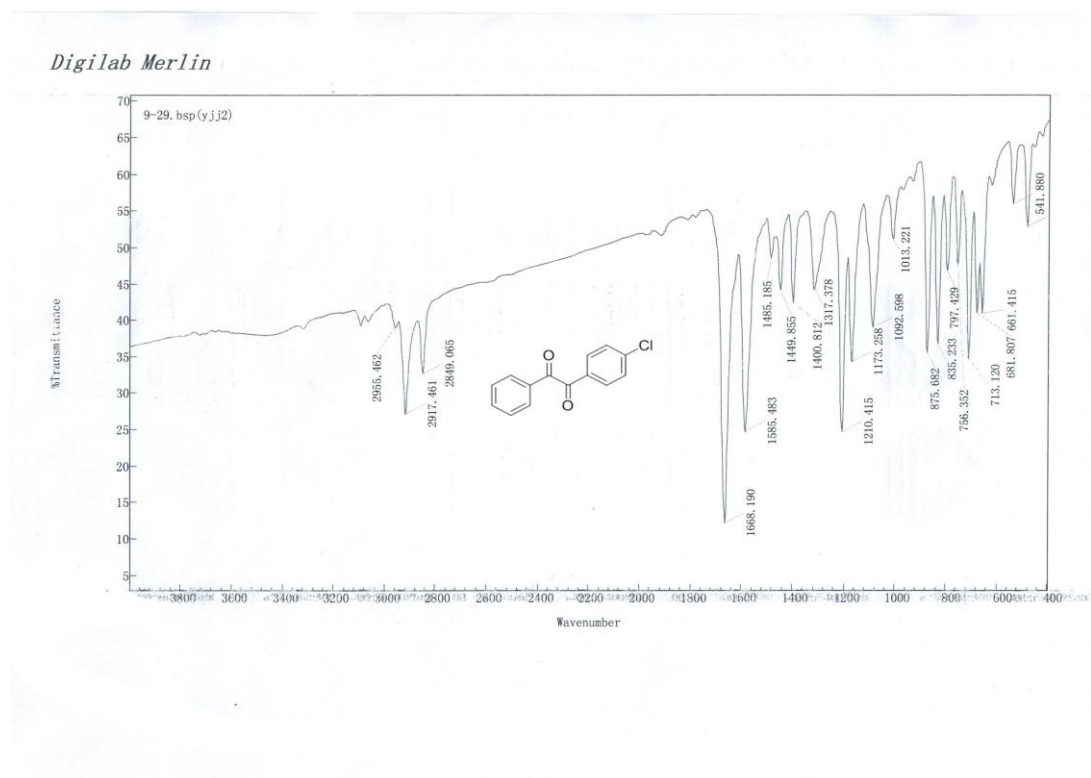

Fig 43. IR of 1-(4-chlorophenyl)-2-phenylethane-1,2-dione

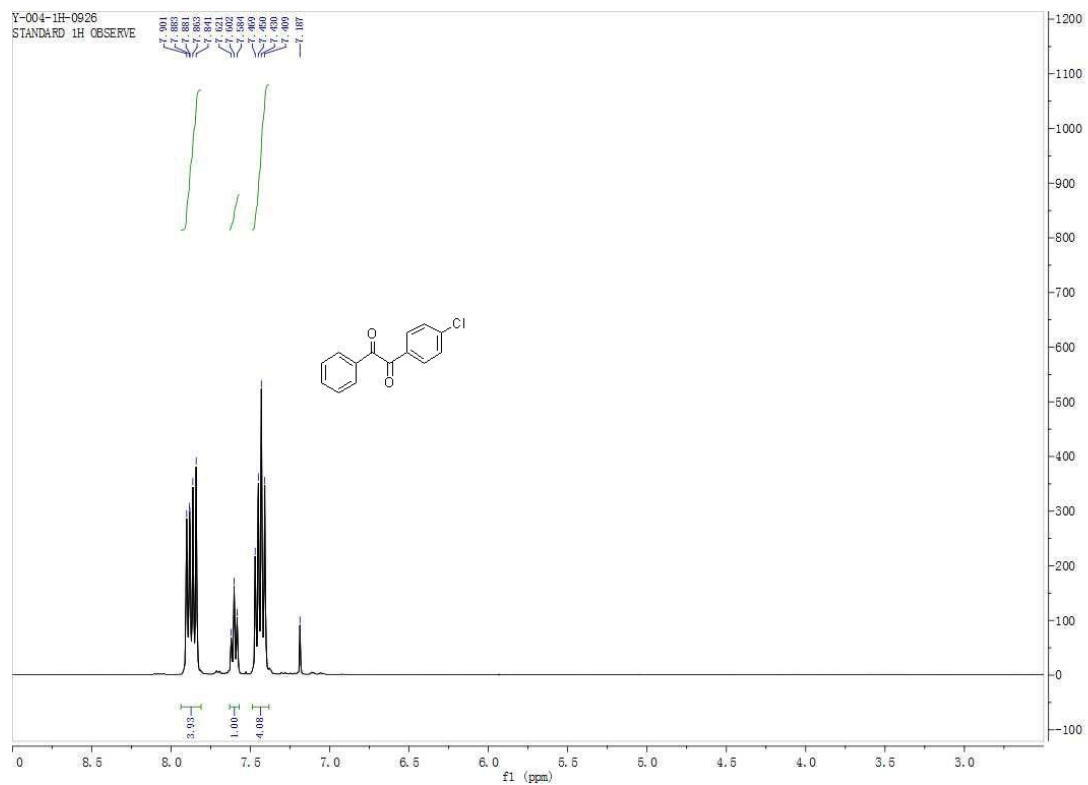

Fig 44. <sup>1</sup>H NMR of 1-(4-chlorophenyl)-2-phenylethane-1,2-dione

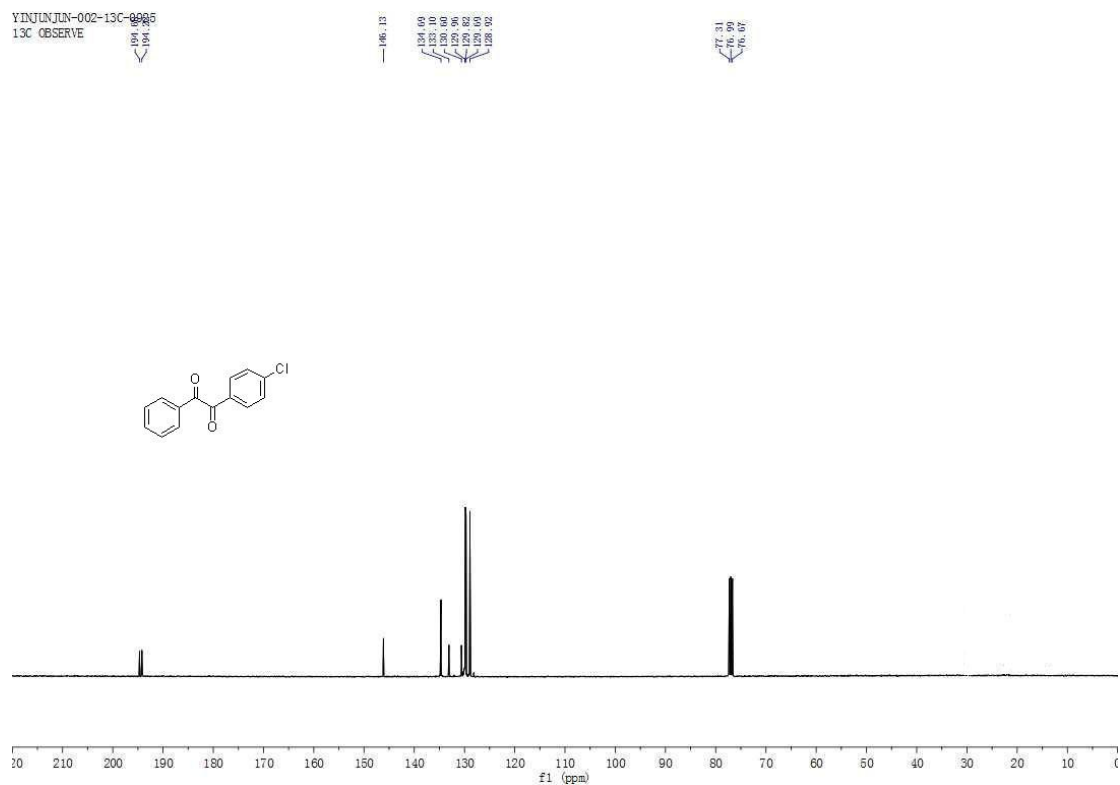

Fig 45. <sup>13</sup>C NMR of 1-(4-chlorophenyl)-2-phenylethane-1,2-dione

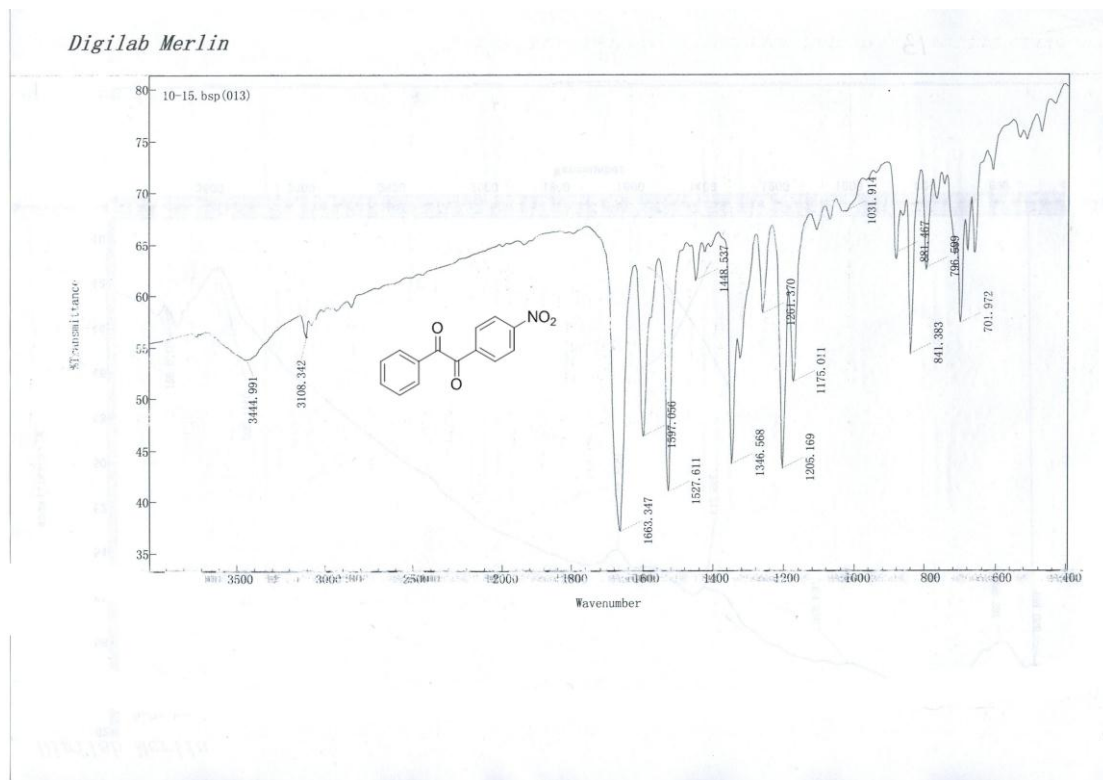

Fig 46. IR of 1-(4-nitrophenyl)-2-phenylethane-1,2-dione

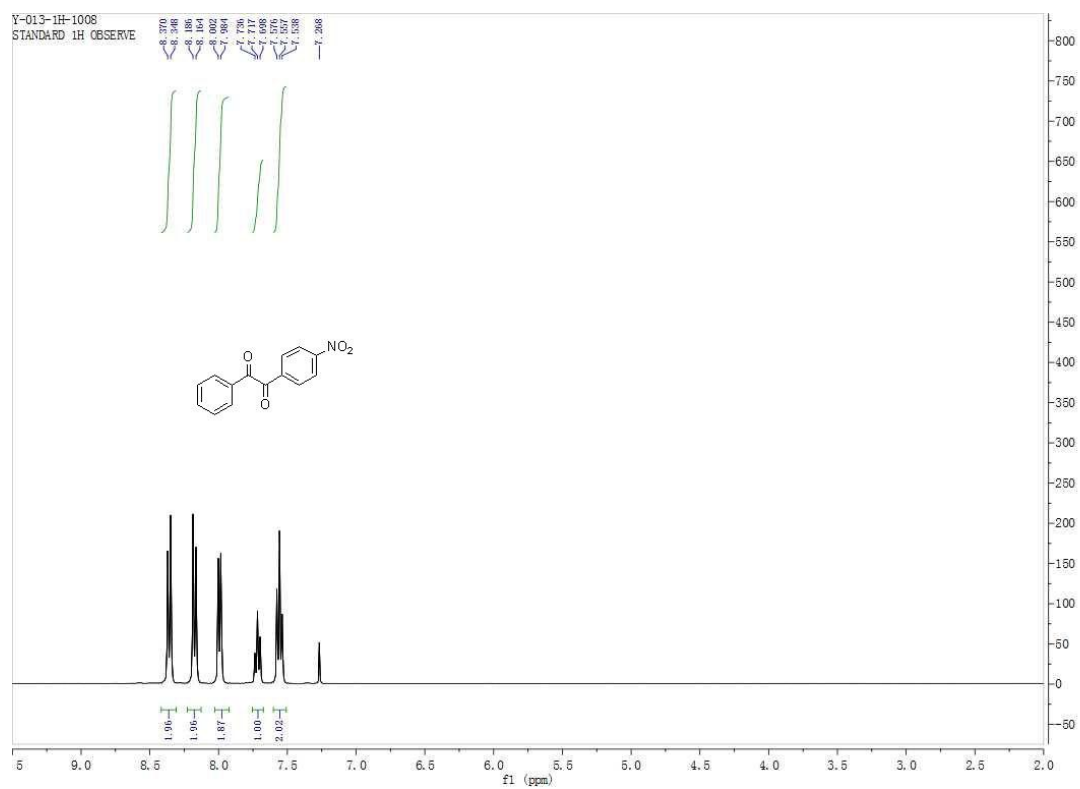

Fig 47.  $^1\text{H}$  NMR of 1-(4-nitrophenyl)-2-phenylethane-1,2-dione



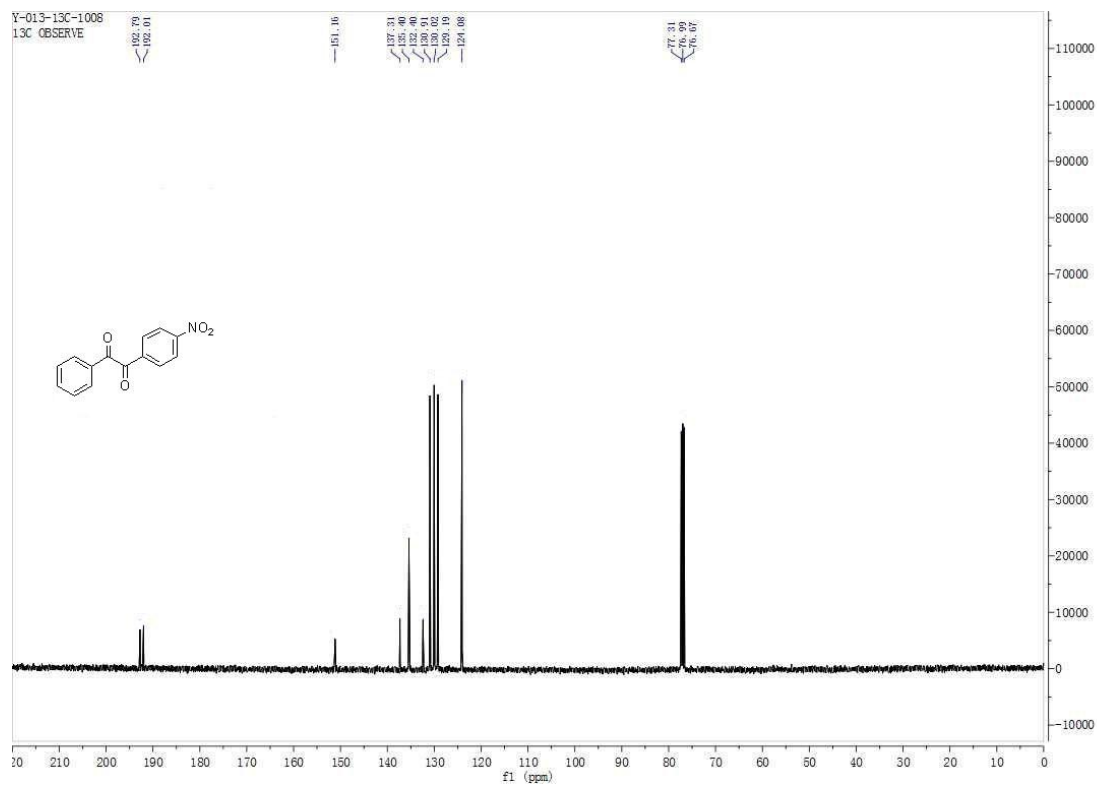

Fig 48.  $^{13}\text{C}$  NMR of 1-(4-nitrophenyl)-2-phenylethane-1,2-dione
